# Supplementary material for: A comprehensive survey of Mn(i) carbonyls as CO-releasing molecules reported over the last two decades
Source: Royal Society of Chemistry journal article supplement (doi:10.1039/d4dt02091j), 2024-01-01
Supplement: d4dt02091j1.pdf [file d4dt02091j1.pdf]

Supporting information

**A comprehensive survey of the Mn(I) carbonyls as CO-releasing molecules  
over the last two decades**

Ahmed M. Mansour,<sup>\*a,b,†</sup> Rabaa M. Khaled,<sup>b,†</sup> and Ola R. Shehab<sup>b</sup>

---

<sup>a.</sup> *Department of Chemistry, United Arab Emirates University, Al-Ain, United Arab Emirates.*  
[Mansour\\_am@uaeu.ac.ae](mailto:Mansour_am@uaeu.ac.ae); [inorganic\\_am@yahoo.com](mailto:inorganic_am@yahoo.com);

<sup>b.</sup> *Department of Chemistry, Faculty of Science, Cairo University, Gamma Street, Giza, Cairo  
12613, Egypt.*

† Equal contribution.

| Table 1 The CO releasing kinetics of Mn(I) carbon monoxide releasing properties |                                       |                                                       |                                                                              |                                                                   |                                                             |                                                                                                                                                                                    |                                                       |           |
|---------------------------------------------------------------------------------|---------------------------------------|-------------------------------------------------------|------------------------------------------------------------------------------|-------------------------------------------------------------------|-------------------------------------------------------------|------------------------------------------------------------------------------------------------------------------------------------------------------------------------------------|-------------------------------------------------------|-----------|
| CORM                                                                            | Activation method                     | CO release Monitoring                                 | CO equivalents (Or moles)                                                    | $t_{1/2}$ (min or s)                                              | Solvent used                                                | $k_{CO}$ ( $\text{min}^{-1}$ or $\text{s}^{-1}$ )                                                                                                                                  | Quantum yield ( $\Phi_{CO}$ )                         | Ref       |
| 3.1.1. Monodentate ancillary ligands                                            |                                       |                                                       |                                                                              |                                                                   |                                                             |                                                                                                                                                                                    |                                                       |           |
| CORM-1 <sup>a</sup>                                                             | Cold light                            | <sup>1</sup> Mb                                       |                                                                              |                                                                   | DMSO                                                        |                                                                                                                                                                                    |                                                       | 23        |
| 1a and 1b <sup>b</sup>                                                          | 365 nm                                | Mb                                                    | 1a: 2.2 ± 0.1 equiv.<br>1b: 2.6 ± 0.4 equiv.                                 | 1a: 6.4 ± 0.1 min<br>1b: 5.6 min                                  | Aqueous media                                               |                                                                                                                                                                                    |                                                       | 44        |
| 2                                                                               | 468 nm                                | Mb                                                    |                                                                              | 21.21 min                                                         | DMSO                                                        | $5.05 \times 10^{-4} \text{ s}^{-1}$                                                                                                                                               |                                                       | 45        |
| 3a–3f                                                                           | 350 nm                                | Mb                                                    | 2 ± 0.33 equiv.                                                              |                                                                   | DCM (< 5 %)                                                 |                                                                                                                                                                                    |                                                       | 46        |
| 3.1.2. <i>N,N</i> -bidentate ligands                                            |                                       |                                                       |                                                                              |                                                                   |                                                             |                                                                                                                                                                                    |                                                       |           |
| 3.1.2.1. 2,2'-Bipyridine photoCORMs                                             |                                       |                                                       |                                                                              |                                                                   |                                                             |                                                                                                                                                                                    |                                                       |           |
| 4–6                                                                             | 510 nm                                | Mb                                                    |                                                                              | 4a: 693 s<br>4b: 1733 s<br>5: 288 s<br>6: 1066 s                  | THF                                                         |                                                                                                                                                                                    |                                                       | 47,<br>48 |
| 7 <sup>c</sup>                                                                  | Green, blue, and UV light             | Mb/CO detector                                        | 2.2 moles                                                                    | Green: 13 min<br>Blue: 4 min<br>UV: 1 min                         | PBS                                                         | Mb ( $\text{min}^{-1}$ ):<br>Green: 0.053, Blue: 0.173, and<br>UV: 0.693.<br>CO detector ( $\text{g}/(\text{mol}\cdot\text{min})$ )<br>Green: 15.15, Blue: 30.49, and<br>UV: 38.42 |                                                       | 48        |
| 4a, 8a and 8b                                                                   | 405 or 470 nm                         | <sup>1</sup> FTIR and <sup>1</sup> H NMR spectroscopy |                                                                              |                                                                   | CH <sub>3</sub> CN                                          |                                                                                                                                                                                    | 4a: 0.22 ± 0.01<br>8a: 0.20 ± 0.01<br>8b: 0.32 ± 0.02 | 50        |
| 9a–9c                                                                           | 405 or 470 nm                         | FTIR and <sup>1</sup> H NMR spectroscopy              |                                                                              |                                                                   | CH <sub>3</sub> CN                                          |                                                                                                                                                                                    | 9a: 0.17 ± 0.01<br>9b: 0.15 ± 0.01<br>9c: 0.19 ± 0.01 | 50,<br>51 |
| 10a and 10b                                                                     | 405 nm                                | FTIR, UV-vis, and <sup>1</sup> H NMR spectroscopy     |                                                                              |                                                                   | CH <sub>3</sub> CN                                          |                                                                                                                                                                                    | 10a: 0.38 ± 0.01<br>10b: 0.27 ± 0.01                  | 50        |
| 4a, 11a–11c                                                                     | 420 (4, 11a), 470 (11b), 510 (11c) nm | Ultrafast <sup>1</sup> TA spectroscopy                |                                                                              |                                                                   | CH <sub>3</sub> CN (4a, 11a–11c) and CHCl <sub>3</sub> (4a) |                                                                                                                                                                                    |                                                       | 52        |
| 12a–12d                                                                         | 365 nm                                | Mb                                                    | 12a: 1.66 equiv.<br>12b: 2.05 equiv.<br>12c: 2.18 equiv.<br>12d: 2.22 equiv. | 12a: 8.41 min<br>12b: 5.04 min<br>12c: 8.86 min<br>12d: 10.70 min | DMSO                                                        |                                                                                                                                                                                    |                                                       | 54        |
| 13a, 13b, 14, 15a, and 15b                                                      | 365 nm                                | Mb                                                    | 13a: 2.4 equiv.<br>13b: 1.0 equiv.<br>14: 2.1 equiv.<br>15a: 1.4 equiv.      | 13a: 5.7 min<br>13b: 6.4 min<br>14: 4.8 min<br>15a: 9.5 min       | DMSO                                                        |                                                                                                                                                                                    |                                                       | 55        |

|                                                |                                                               |                                                  |                                                                                                                                     |                                                                                                                        |                                                                                    |                                                                                                                                                                                                         |             |    |
|------------------------------------------------|---------------------------------------------------------------|--------------------------------------------------|-------------------------------------------------------------------------------------------------------------------------------------|------------------------------------------------------------------------------------------------------------------------|------------------------------------------------------------------------------------|---------------------------------------------------------------------------------------------------------------------------------------------------------------------------------------------------------|-------------|----|
|                                                |                                                               |                                                  | <b>15b</b> : 2.0 equiv.                                                                                                             | <b>15b</b> : 6.9 min                                                                                                   |                                                                                    |                                                                                                                                                                                                         |             |    |
| <b>16a–16e</b>                                 | 365 nm                                                        | Mb                                               | <b>16a</b> : 1.4 equiv.<br><b>16b</b> : 1.4 equiv.<br><b>16c</b> : 1.5 equiv.<br><b>16d</b> : 1.7 equiv.<br><b>16e</b> : 2.2 equiv. | <b>16a</b> : 9.5 min<br><b>16b</b> : 11.4 min<br><b>16c</b> : 13.9 min<br><b>16d</b> : 3.9 min<br><b>16e</b> : 8.7 min | DMSO                                                                               |                                                                                                                                                                                                         |             | 56 |
| <b>17a and 17b<sup>d</sup></b>                 | 365 nm                                                        | Mb                                               | <b>17a</b> : 2.01 equiv.<br><b>17b</b> : 1.31 equiv.                                                                                | <b>17a</b> : 12.41 min<br><b>17b</b> : 14.05 min                                                                       | DMSO                                                                               |                                                                                                                                                                                                         |             | 57 |
| <b>3.1.2.2. 1,10-phenanthroline photoCORMs</b> |                                                               |                                                  |                                                                                                                                     |                                                                                                                        |                                                                                    |                                                                                                                                                                                                         |             |    |
| <b>4, 18–20</b>                                | UV light and low power (15 mW/cm <sup>2</sup> ) visible light | UV-vis, and Mb.                                  |                                                                                                                                     |                                                                                                                        | DCM                                                                                | <b>4</b> : Vis: 1.21 ± 0.02<br>UV: 12.11 ± 0.0<br><b>18</b> : Vis: 4.65 ± 0.03<br>UV: 2.44 ± 0.03<br><b>19</b> : Vis: 3.44 ± 0.02<br>UV: 3.18 ± 0.02<br><b>20</b> : Vis: 6.29 ± 0.03<br>UV: 0.94 ± 0.03 |             | 58 |
| <b>21</b>                                      | Low power (15 mW/cm <sup>2</sup> ) visible light (> 405 nm)   | FTIR and Mb.                                     | 3 CO were released                                                                                                                  |                                                                                                                        | CH <sub>3</sub> CN                                                                 | 10.5 ± 0.02                                                                                                                                                                                             | 0.35 ± 0.03 | 59 |
| <b>22</b>                                      | Low power (15 mW/cm <sup>2</sup> ) visible light              | FTIR and Mb.                                     | 3 CO were released                                                                                                                  |                                                                                                                        | CH <sub>3</sub> CN, and 2% (v/v) CH <sub>3</sub> CN/PBS                            | 0.13                                                                                                                                                                                                    | 0.39 ± 0.03 | 60 |
| <b>23 and 24</b>                               | 365–555 nm                                                    | FTIR and <sup>1</sup> H NMR spectroscopy         |                                                                                                                                     |                                                                                                                        | Acetone DCM                                                                        |                                                                                                                                                                                                         |             | 61 |
| <b>25</b>                                      | Low power (10 mW/cm <sup>2</sup> ) visible light              | Mb                                               |                                                                                                                                     |                                                                                                                        | PBS                                                                                | 0.0030 ± 0.010 (s <sup>-1</sup> )                                                                                                                                                                       |             | 62 |
| <b>26</b>                                      | 420 nm                                                        | Mb                                               | <b>26</b> : 2.3 ± 0.02                                                                                                              | <b>26</b> : 3.31 ± 2.30                                                                                                | PBS                                                                                |                                                                                                                                                                                                         |             | 63 |
| <b>27a</b>                                     | 350 nm                                                        | Mb, <sup>5</sup> EPR, FTIR, and NMR spectroscopy |                                                                                                                                     |                                                                                                                        | CH <sub>3</sub> CN, DCM, CH <sub>3</sub> CN/H <sub>2</sub> O, and H <sub>2</sub> O |                                                                                                                                                                                                         |             | 65 |
| <b>27b</b>                                     | Low power (15 mW/cm <sup>2</sup> ) visible light              | Mb, EPR, and FTIR spectroscopy                   |                                                                                                                                     |                                                                                                                        | CH <sub>3</sub> CN, DMSO and PBS                                                   | PBS: 0.44 ± 0.02<br>CH <sub>3</sub> CN: 0.51 ± 0.02                                                                                                                                                     |             | 66 |
| <b>28–30</b>                                   | 435–450 nm                                                    | Mb                                               | 1.4 equiv.                                                                                                                          | <b>28</b> : 23 min<br><b>29a</b> : 13 min<br><b>29b</b> : 10 min<br><b>30</b> : 6 min                                  | DCM and 0.5% (v/v) DMSO/H <sub>2</sub> O                                           |                                                                                                                                                                                                         |             | 67 |

|                                                                                 |                                         |                                          |                                                                                                                               |                                                                                                     |                                                                                    |                                                                                                                                                                                                                                                                                   |                                                                                       |                                         |
|---------------------------------------------------------------------------------|-----------------------------------------|------------------------------------------|-------------------------------------------------------------------------------------------------------------------------------|-----------------------------------------------------------------------------------------------------|------------------------------------------------------------------------------------|-----------------------------------------------------------------------------------------------------------------------------------------------------------------------------------------------------------------------------------------------------------------------------------|---------------------------------------------------------------------------------------|-----------------------------------------|
| <b>31</b>                                                                       | 730 nm                                  | Mb, EPR, and FTIR spectroscopy           |                                                                                                                               |                                                                                                     | CHCl <sub>3</sub> and CH <sub>3</sub> CN                                           | <b>31</b> : 0.0566 ± 0.0008 min <sup>-1</sup>                                                                                                                                                                                                                                     | <b>31</b> : 0.064 ± 0.002                                                             | <b>68</b>                               |
| <b>3.1.2.3. κ<sup>2</sup>N<sup>1</sup>N<sup>2</sup>- terpyridine photoCORMs</b> |                                         |                                          |                                                                                                                               |                                                                                                     |                                                                                    |                                                                                                                                                                                                                                                                                   |                                                                                       |                                         |
| <b>32a–32h</b>                                                                  | 372 nm                                  | FTIR and <sup>1</sup> H NMR spectroscopy |                                                                                                                               |                                                                                                     | CH <sub>3</sub> CN                                                                 |                                                                                                                                                                                                                                                                                   | <b>32e</b> : 0.7                                                                      | <b>70</b> ,<br><b>71</b>                |
| <b>33a–33h</b>                                                                  | 372 nm                                  | FTIR and <sup>1</sup> H NMR spectroscopy |                                                                                                                               |                                                                                                     | CH <sub>3</sub> CN and H <sub>2</sub> O                                            |                                                                                                                                                                                                                                                                                   |                                                                                       | <b>71</b>                               |
| <b>34 and 35</b>                                                                | 405 and 451 nm<br>750 and 800 nm lasers | <sup>13</sup> C–TCD                      | <b>35</b> : 2.53 ± 0.06<br>(After 180 min of illumination at 451 nm in aerobic EtOH)                                          |                                                                                                     | H <sub>2</sub> O, EtOH, EtOH/H <sub>2</sub> O, and EtOH/PBS                        |                                                                                                                                                                                                                                                                                   | <b>35</b> at 451 nm<br>Aerobic EtOH:<br>0.258–0.277<br>Anaerobic EtOH:<br>0.233–0.252 | <b>72</b>                               |
| <b>36</b>                                                                       | 410 nm                                  | Mb                                       |                                                                                                                               | 9.8 min <sup>a</sup>                                                                                | CH <sub>3</sub> CN                                                                 | 0.07065                                                                                                                                                                                                                                                                           |                                                                                       | <b>73</b>                               |
| <b>37–42</b>                                                                    | - 468 nm<br>- 525 nm                    | Mb                                       | At 468 nm:<br><b>37</b> : 3.00 ± 0.03 equiv.<br><b>39</b> : 5.66 ± 0.16 equiv. <sup>f</sup><br><b>41</b> : 2.64 ± 0.03 equiv. | <b>37</b> : 1.52 ± 0.03 min<br><b>39</b> : 1.68 ± 0.04 min<br><b>41</b> : 2.22 ± 0.15 min           | DMSO                                                                               | <b>37</b> : (0.76 ± 0.01) × 10 <sup>-2</sup> s <sup>-1</sup><br><b>39</b> : (7.0 ± 0.05) × 10 <sup>-2</sup> s <sup>-1</sup><br><b>41</b> : (5.0 ± 0.03) × 10 <sup>-2</sup> s <sup>-1</sup>                                                                                        |                                                                                       | <b>74</b>                               |
| <b>3.1.2.4. Benzimidazole and benzothiazole photoCORMs</b>                      |                                         |                                          |                                                                                                                               |                                                                                                     |                                                                                    |                                                                                                                                                                                                                                                                                   |                                                                                       |                                         |
| <b>43a and 43b, 44</b>                                                          | 468 nm                                  | Mb and <sup>1</sup> H NMR spectroscopy   |                                                                                                                               | <b>43a</b> : 7.82 min<br><b>43b</b> : 2.53 min<br><b>44</b> : 11.42 min                             | DMSO                                                                               | <b>43a</b> : 0.0014 s <sup>-1</sup><br><b>43b</b> : 0.0045 s <sup>-1</sup><br><b>44</b> : 0.0010 s <sup>-1</sup>                                                                                                                                                                  |                                                                                       | <b>75</b>                               |
| <b>45 and 46</b>                                                                | 468 nm                                  | Mb                                       | 2.5 equiv.                                                                                                                    | <b>45</b> : 7.2 min<br><b>46</b> : 2.59 min                                                         | DMSO                                                                               | <b>45</b> : 0.0016 s <sup>-1</sup><br><b>46</b> : 0.0037 s <sup>-1</sup>                                                                                                                                                                                                          |                                                                                       | <b>76</b>                               |
| <b>47, 48, 49a, 49b, 50</b>                                                     | 468 nm                                  | Mb                                       | <b>47</b> and <b>48</b> : 2 equiv.<br><b>49</b> and <b>50</b> : 5 equiv.                                                      | <b>47</b> : 3.28<br><b>48</b> : 3.05<br><b>49a</b> : 2.04<br><b>49b</b> : 10.07<br><b>50</b> : 3.75 | DMSO                                                                               | <b>47</b> : 35.3 × 10 <sup>-4</sup> s <sup>-1</sup><br><b>48</b> : 38.1 × 10 <sup>-4</sup> s <sup>-1</sup><br><b>49a</b> : 56.9 × 10 <sup>-4</sup> s <sup>-1</sup><br><b>49b</b> : 11.5 × 10 <sup>-4</sup> s <sup>-1</sup><br><b>50</b> : 30.8 × 10 <sup>-4</sup> s <sup>-1</sup> |                                                                                       | <b>77</b>                               |
| <b>43a<sup>75</sup>, 44<sup>77</sup>, 51<sup>78</sup> and 52<sup>78</sup></b>   | 365 nm                                  | Mb, CO sensor, and FTIR spectroscopy     |                                                                                                                               | <b>43a</b> : 15 min<br><b>44</b> : 5 min<br><b>51</b> : 6 min<br><b>52</b> : 10 min                 | DMSO and CH <sub>3</sub> CN                                                        | <b>43a</b> : 1.9<br><b>44</b> : 10.8<br><b>51</b> : 8.0<br><b>52</b> : 3.4                                                                                                                                                                                                        | <b>43a</b> : 0.12<br><b>44</b> : 0.36<br><b>51</b> : 0.28<br><b>52</b> : 0.16         | <b>75</b> ,<br><b>77</b> ,<br><b>78</b> |
| <b>53a–53h</b>                                                                  | 412–525 nm                              | CO sensor, and FTIR spectroscopy         | 468 nm:<br>0.9–1.8 equiv.<br>525 nm:<br><b>53f</b> : 0.9 equiv.                                                               |                                                                                                     | DMSO and 10 % (v/v) DMSO/H <sub>2</sub> O                                          |                                                                                                                                                                                                                                                                                   |                                                                                       | <b>79</b>                               |
| <b>54</b>                                                                       | 400–440 nm                              | Mb                                       |                                                                                                                               |                                                                                                     | DCM<br>CH <sub>3</sub> CN<br>40% (v/v)<br>CH <sub>3</sub> CN/H <sub>2</sub> O<br>O | 4.32 ± 0.01 (DCM)<br>1.05 ± 0.01 (CH <sub>3</sub> CN)<br>0.23 ± 0.01 (40% (v/v) CH <sub>3</sub> CN/H <sub>2</sub> O)                                                                                                                                                              |                                                                                       | <b>80</b>                               |

|                                             |                                                              |                                      |                                                                      |                                                            |                                                                                                        |                                                                                                                                                                                                                                                                                                                   |                                                                                                                                               |           |
|---------------------------------------------|--------------------------------------------------------------|--------------------------------------|----------------------------------------------------------------------|------------------------------------------------------------|--------------------------------------------------------------------------------------------------------|-------------------------------------------------------------------------------------------------------------------------------------------------------------------------------------------------------------------------------------------------------------------------------------------------------------------|-----------------------------------------------------------------------------------------------------------------------------------------------|-----------|
|                                             |                                                              |                                      |                                                                      |                                                            | 20% (v/v)<br>DMSO/H <sub>2</sub><br>O                                                                  | 0.61 ± 0.01 (20% (v/v)<br>DMSO/H <sub>2</sub> O)                                                                                                                                                                                                                                                                  |                                                                                                                                               |           |
| <b>55 and 56</b>                            | Low power<br>(10 mW/cm <sup>2</sup> )<br>visible light       | Mb                                   |                                                                      |                                                            | CH <sub>3</sub> CN                                                                                     | <b>55:</b> 0.98 ± 0.02<br><b>56:</b> 2.51 ± 0.02                                                                                                                                                                                                                                                                  |                                                                                                                                               | <b>81</b> |
| <b>57</b>                                   | Low power<br>(15 mW/cm <sup>2</sup> )<br>visible light       | Mb, EPR, and<br>FTIR<br>spectroscopy |                                                                      |                                                            | CH <sub>3</sub> CN<br>DMSO<br>PBS                                                                      | PBS: 1.54 ± 0.02<br>CH <sub>3</sub> CN: 0.91 ± 0.02                                                                                                                                                                                                                                                               |                                                                                                                                               | <b>66</b> |
| <b>58 and 59</b>                            | low-power<br>(mW levels)<br>broadband<br>visible light       | Mb                                   |                                                                      |                                                            | DCM                                                                                                    | <b>58:</b> 0.96 min <sup>-1</sup>                                                                                                                                                                                                                                                                                 |                                                                                                                                               | <b>82</b> |
| <b>3.1.2.5. N,N-Schiff-base PhotoCORMs</b>  |                                                              |                                      |                                                                      |                                                            |                                                                                                        |                                                                                                                                                                                                                                                                                                                   |                                                                                                                                               |           |
| <b>60a, 60b,<br/>61a, 61b,<br/>62a, 62b</b> | 400–550 nm                                                   | Mb                                   |                                                                      |                                                            | CH <sub>3</sub> CN<br>THF                                                                              | <b>60:</b> (2.1 ± 0.1) × 10 <sup>-3</sup> s <sup>-1</sup><br><b>60b:</b> (1.1 ± 0.1) × 10 <sup>-3</sup> s <sup>-1</sup><br><b>61a:</b> (2.6 ± 0.1) × 10 <sup>-3</sup> s <sup>-1</sup><br><b>61b:</b> (2.0 ± 0.1) × 10 <sup>-3</sup> s <sup>-1</sup><br><b>62b:</b> (1.4 ± 0.1) × 10 <sup>-3</sup> s <sup>-1</sup> | <b>60a:</b> 0.340 ± 0.010<br><b>60b:</b> 0.116 ± 0.010<br><b>61a:</b> 0.370 ± 0.010<br><b>61b:</b> 0.208 ± 0.010<br><b>62b:</b> 0.130 ± 0.010 | <b>83</b> |
| <b>63 and 64</b>                            | ≥ 520 nm                                                     | Mb, and FTIR<br>spectroscopy         |                                                                      |                                                            | DMSO<br>10% (v/v)<br>DMSO/H <sub>2</sub><br>O<br>CH <sub>2</sub> Cl <sub>2</sub><br>CH <sub>3</sub> CN | <b>63:</b> 25.9 ± 0.2 <sup>f</sup><br><b>64:</b> 11.1 ± 0.2                                                                                                                                                                                                                                                       | <b>63:</b> 15.2 s                                                                                                                             | <b>84</b> |
| <b>65–67</b>                                | Low power<br>(10–15<br>mW/cm <sup>2</sup> )<br>visible light | Mb, and EPR,<br>spectroscopy         |                                                                      |                                                            | DMSO,<br>DCM and<br>PBS                                                                                | <b>65:</b> 5.56 ± 0.02 <sup>n</sup><br><b>66:</b> 12.43 ± 0.02<br><b>67:</b> 2.84 ± 0.02                                                                                                                                                                                                                          |                                                                                                                                               | <b>85</b> |
| <b>68</b>                                   | 468 nm<br>525 nm                                             |                                      | 525 nm: one equiv.<br>468 nm: three equiv.                           | 525 nm: 27.85 ± 1.60<br>min<br>468 nm: 2.01 ± 0.21<br>min  | DMSO                                                                                                   | 525 nm: (0.40 ± 0.03) × 10 <sup>-3</sup> s <sup>-1</sup><br>468 nm: (0.59 ± 0.03) × 10 <sup>-2</sup> s <sup>-1</sup>                                                                                                                                                                                              |                                                                                                                                               | <b>86</b> |
| <b>69 and 70</b>                            | Broad band<br>(15 mW/cm <sup>2</sup> )<br>visible light      | Mb                                   |                                                                      |                                                            | 2% (v/v)<br>CH <sub>3</sub> CN/PB<br>S<br>CH <sub>3</sub> CN<br>DCM<br>CHCl <sub>3</sub>               | <b>69:</b> 1.03<br><b>70:</b> 0.66                                                                                                                                                                                                                                                                                | <b>69:</b> 0.35 ± 0.02<br><b>70:</b> 0.23 ± 0.02                                                                                              | <b>87</b> |
| <b>62c–62f<br/>71a–71d</b>                  | 525 nm<br>468 nm                                             | Mb, and FTIR<br>spectroscopy         | 525 nm: one ( <b>62d, 71b</b> )<br>468 nm: three ( <b>62d, 71b</b> ) | <b>62d:</b> 1.91 ± 0.16 min<br><b>71b:</b> 2.27 ± 0.27 min | DMSO<br>DCM                                                                                            | <b>62d:</b> (0.60 ± 0.05) × 10 <sup>-2</sup> s <sup>-1</sup><br><b>71b:</b> (0.50 ± 0.05) × 10 <sup>-2</sup> s <sup>-1</sup>                                                                                                                                                                                      |                                                                                                                                               | <b>88</b> |
| <b>72a–72f</b>                              | 365 nm                                                       | FTIR                                 |                                                                      |                                                            | DMSO and<br>DCM                                                                                        |                                                                                                                                                                                                                                                                                                                   |                                                                                                                                               | <b>89</b> |
| <b>73 and 74</b>                            | 365 nm                                                       |                                      | <b>73:</b> 2                                                         | <b>73:</b> 22.28 min                                       | DMSO/PBS                                                                                               |                                                                                                                                                                                                                                                                                                                   |                                                                                                                                               | <b>90</b> |

| 3.1.2.6. Azo-pyridine photoCORMs                |                  |                                               |                                                                                                 |                                                                                                                                                                                                                                                                                                                                                                                                                                                                                                                                   |                                                                                    |                                                                                                                                                                                                                                                                                                                                                                                                                                                                                                                                   |                                                                                                      |           |
|-------------------------------------------------|------------------|-----------------------------------------------|-------------------------------------------------------------------------------------------------|-----------------------------------------------------------------------------------------------------------------------------------------------------------------------------------------------------------------------------------------------------------------------------------------------------------------------------------------------------------------------------------------------------------------------------------------------------------------------------------------------------------------------------------|------------------------------------------------------------------------------------|-----------------------------------------------------------------------------------------------------------------------------------------------------------------------------------------------------------------------------------------------------------------------------------------------------------------------------------------------------------------------------------------------------------------------------------------------------------------------------------------------------------------------------------|------------------------------------------------------------------------------------------------------|-----------|
| <b>75a and 75b</b>                              | ≥ 520 nm         | Mb                                            |                                                                                                 |                                                                                                                                                                                                                                                                                                                                                                                                                                                                                                                                   | DCM,<br>CH <sub>3</sub> CN<br>20 % (v/v)<br>CH <sub>3</sub> CN/H <sub>2</sub><br>O | DCM:<br><b>75a:</b> 21.94 ± 0.01 min <sup>-1</sup><br><b>75b:</b> 15.28 ± 0.01 min <sup>-1</sup><br>CH <sub>3</sub> CN:<br><b>75a:</b> 11.216 ± 0.01 min <sup>-1</sup><br>20 % (v/v) CH <sub>3</sub> CN/H <sub>2</sub> O:<br><b>75a:</b> 4.987 ± 0.01 min <sup>-1</sup>                                                                                                                                                                                                                                                           | CH <sub>3</sub> CN:<br><b>75a:</b> 0.48 ± 0.01                                                       | 91,<br>92 |
| <b>76a–76e</b>                                  | ≥ 625 nm         | Mb                                            | In the dark<br><b>76a–76b:</b> ≤ 0.1 equiv.<br><b>76c–76e:</b> ≈ 0.7 equiv.                     | t <sub>1/2</sub> (h)<br>CH <sub>2</sub> Cl <sub>2</sub><br><b>76a:</b> 3.52 ± 0.06<br><b>76b:</b> 3.60 ± 0.05<br><b>76c:</b> 1.21 ± 0.14<br><b>76d:</b> 0.48 ± 0.01<br><b>76e:</b> 0.41 ± 0.01<br>DMSO<br><b>76a:</b> 1.50 ± 0.05<br><b>76b:</b> 1.13 ± 0.17<br><b>76c:</b> 0.76 ± 0.05<br>(3.05 ± 0.30) <sup>i</sup><br>(0.85 ± 0.11) <sup>i</sup><br><b>76d:</b> 0.21 ± 0.01<br>(1.07 ± 0.02) <sup>i</sup><br>(0.50 ± 0.05) <sup>i</sup><br><b>76e:</b> 0.31 ± 0.01<br>(1.23 ± 0.03) <sup>i</sup><br>(0.54 ± 0.07) <sup>i</sup> | DMSO and<br>DCM                                                                    |                                                                                                                                                                                                                                                                                                                                                                                                                                                                                                                                   |                                                                                                      | 93        |
| 3.1.2.7. Other <i>N,N</i> -bidentate photoCORMs |                  |                                               |                                                                                                 |                                                                                                                                                                                                                                                                                                                                                                                                                                                                                                                                   |                                                                                    |                                                                                                                                                                                                                                                                                                                                                                                                                                                                                                                                   |                                                                                                      |           |
| <b>77a–77l</b>                                  | 365 and 480 nm   | Portable CO sensor                            | Illumination for 30 min:<br><b>77a</b> (solid phase): 0.086 (365 nm) and 0.089 (480 nm) CO/CORM |                                                                                                                                                                                                                                                                                                                                                                                                                                                                                                                                   | Solid state<br>MeOH                                                                |                                                                                                                                                                                                                                                                                                                                                                                                                                                                                                                                   |                                                                                                      | 94        |
| <b>78–81a</b>                                   | 380 nm           | FTIR and UV-vis spectroscopy as well as COP-1 |                                                                                                 |                                                                                                                                                                                                                                                                                                                                                                                                                                                                                                                                   | DCM and<br>CH <sub>3</sub> CN                                                      | DCM<br><b>78:</b> (3.0 ± 0.1) × 10 <sup>-3</sup> s <sup>-1</sup><br><b>79:</b> (4.0 ± 0.1) × 10 <sup>-3</sup> s <sup>-1</sup><br><b>80:</b> (4.9 ± 0.1) × 10 <sup>-3</sup> s <sup>-1</sup><br><b>81:</b> (2.3 ± 0.1) × 10 <sup>-3</sup> s <sup>-1</sup><br>CH <sub>3</sub> CN<br><b>78:</b> (1.3 ± 0.1) × 10 <sup>-3</sup> s <sup>-1</sup><br><b>79:</b> (3.0 ± 0.1) × 10 <sup>-3</sup> s <sup>-1</sup><br><b>80:</b> (1.0 ± 0.1) × 10 <sup>-3</sup> s <sup>-1</sup><br><b>81:</b> (1.0 ± 0.1) × 10 <sup>-3</sup> s <sup>-1</sup> | DCM<br><b>78:</b> ____<br><b>79:</b> 0.05 ± 0.01<br><b>80:</b> 0.06 ± 0.01<br><b>81:</b> 0.02 ± 0.01 | 95,<br>96 |
| <b>81a</b>                                      | 307 nm<br>350 nm | Mb                                            |                                                                                                 |                                                                                                                                                                                                                                                                                                                                                                                                                                                                                                                                   | CH <sub>3</sub> CN                                                                 | 307 nm: (11.7 ± 0.2) × 10 <sup>-2</sup> s <sup>-1</sup><br>350 nm: (5.2 ± 0.2) × 10 <sup>-3</sup> s <sup>-1</sup>                                                                                                                                                                                                                                                                                                                                                                                                                 | (5.2 ± 0.2) × 10 <sup>-3</sup>                                                                       | 95        |

|                                               |                                                                  |                           |                                                                                                                                                            |                                                                                                                           |                                              |                                                                                                                                                                                                                                        |  |            |
|-----------------------------------------------|------------------------------------------------------------------|---------------------------|------------------------------------------------------------------------------------------------------------------------------------------------------------|---------------------------------------------------------------------------------------------------------------------------|----------------------------------------------|----------------------------------------------------------------------------------------------------------------------------------------------------------------------------------------------------------------------------------------|--|------------|
| <b>81b</b>                                    | 468 nm                                                           | Mb                        | 3 equiv.                                                                                                                                                   | 17.28 ± 3.6 min                                                                                                           | DMSO                                         | $(7.0 \pm 0.10) \times 10^{-4} \text{ s}^{-1}$                                                                                                                                                                                         |  | 97         |
| <b>82</b>                                     | 365 nm                                                           | Mb                        | 1.3 moles                                                                                                                                                  |                                                                                                                           | DMSO                                         |                                                                                                                                                                                                                                        |  | 98         |
| <b>3.1.3. N,O-bidentate ligands</b>           |                                                                  |                           |                                                                                                                                                            |                                                                                                                           |                                              |                                                                                                                                                                                                                                        |  |            |
| <b>83</b>                                     | 400 and 465 nm                                                   | Mb                        | 465 nm: 1.4 moles<br>400 nm: 2 moles                                                                                                                       |                                                                                                                           | DMSO                                         |                                                                                                                                                                                                                                        |  | 99-<br>101 |
| <b>84 and 85</b>                              | 400–700 nm                                                       | Mb and IR spectroscopy    |                                                                                                                                                            |                                                                                                                           | CH <sub>3</sub> CN<br>MeOH<br>(Mb)           | <b>84:</b> $(1.92 \pm 0.02) \times 10^{-3}$ and<br>$(2.76 \pm 0.03) \times 10^{-3}$<br><b>85:</b> $(3.30 \pm 0.01) \times 10^{-3}$ and<br>$(4.46 \pm 0.04) \times 10^{-3}$                                                             |  | 103        |
| <b>86a and 86b</b>                            | 468 nm                                                           | Mb                        | DMSO:<br><b>86a:</b> 2.75 ± 0.03 equiv.<br><b>86b:</b> 2.33 ± 0.02 equiv.<br>H <sub>2</sub> O:<br><b>86a:</b> 0.66 equiv.<br><b>86b:</b> 1.31 equiv.       | DMSO:<br><b>86a:</b> 10.26 min<br><b>86b:</b> 8.93 min<br>H <sub>2</sub> O:<br><b>86a:</b> 5.4 min<br><b>86b:</b> 5.2 min | DMSO<br>H <sub>2</sub> O                     | DMSO:<br><b>86a:</b> $1.1 \times 10^{-3} \text{ s}^{-1}$<br><b>86b:</b> $1.3 \times 10^{-3} \text{ s}^{-1}$<br>H <sub>2</sub> O:<br><b>86a:</b> $2.1 \times 10^{-3} \text{ s}^{-1}$<br><b>86b:</b> $2.2 \times 10^{-3} \text{ s}^{-1}$ |  | 104        |
| <b>87</b>                                     | 468 nm                                                           | Mb                        | 3 equiv.                                                                                                                                                   | 4.54 ± 0.17 min                                                                                                           | DMSO                                         | $(26.0 \pm 0.18) \times 10^{-3} \text{ s}^{-1}$                                                                                                                                                                                        |  | 97         |
| <b>88</b>                                     | - UV (365–370 nm)<br>- Blue (465–470 nm)<br>- Green (520–530 nm) | - Mb<br>- CO detector     | Mb:<br>UV: 2.3 moles<br>Blue: 2.1 moles<br>Green: 1.4 moles                                                                                                | Mb:<br>UV: 7 min<br>Blue: 37 min<br>Green: 62 min                                                                         | PBS                                          | Mb: CO detector:<br>(min <sup>-1</sup> ) (g/mol.min)<br>UV: 0.099 2.74<br>Blue: 0.019 2.07<br>Green: 0.011 1.11                                                                                                                        |  | 49         |
| <b>3.1.4. N,S- and N,Se-bidentate ligands</b> |                                                                  |                           |                                                                                                                                                            |                                                                                                                           |                                              |                                                                                                                                                                                                                                        |  |            |
| <b>89</b>                                     | 468 and 525 nm                                                   | Mb and CO sensor          | CO sensor:<br>468 nm: 1.5 equiv.<br>525 nm: 1.0 equiv.<br>Mb:<br>468 nm: 2.62 equiv.<br>525 nm: 1.70 equiv.                                                | Mb:<br>468 nm: 1.0 ± 0.1 min<br>525 nm:<br>15.0 ± 0.2 min                                                                 | DMSO                                         | Mb:<br>468 nm: 0.01155 s <sup>-1</sup><br>525 nm: 0.00066 s <sup>-1</sup>                                                                                                                                                              |  | 106        |
| <b>90a, 90b and 91</b>                        | 468 nm                                                           | Mb                        | <b>90a–90b:</b> 2 equiv.<br><b>91:</b> one equiv.                                                                                                          |                                                                                                                           | DMSO                                         |                                                                                                                                                                                                                                        |  | 107        |
| <b>92–94</b>                                  | 380 nm                                                           | *COP-1<br>UV<br>IR<br>NMR | 3 COs                                                                                                                                                      |                                                                                                                           | DCM,<br>CH <sub>3</sub> CN<br>PBS, pH<br>7.4 | UV:<br><b>92:</b> $(1.82 \pm 0.03) 10^{-3} \text{ s}^{-1}$<br><b>93:</b> $(7.76 \pm 0.15) 10^{-3} \text{ s}^{-1}$<br><b>94:</b> $(7.87 \pm 0.15) 10^{-3} \text{ s}^{-1}$                                                               |  | 108        |
| <b>95a–95d</b>                                | 365 nm (UV)<br>405 nm (purple)<br>435 nm (blue)                  | Mb                        | (equiv.)<br>UV Purple Blue<br><b>95a:</b> 2.04, 1.64, 1.08<br><b>95b:</b> 2.43, 2.23, 1.24<br><b>95c:</b> 2.17, 2.01, 1.85<br><b>95d:</b> 2.05, 1.55, 1.32 | (s)<br>UV Purple<br>Blue<br><b>95a:</b> 11.03 8.46<br>92.31                                                               |                                              | (s <sup>-1</sup> )<br>UV Purple Blue<br><b>95a:</b> 0.0262, 0.0139, 0.00666<br><b>95b:</b> 0.0121, 0.0138, 0.0181<br><b>95c:</b> 0.0184, 0.0145, 0.00488<br><b>95d:</b> 0.0195, 0.057, 0.0064                                          |  | 110        |

|                                        |                                         |                                        |                                                                                                                                              |                                                                                                          |                                        |                                                                                                                     |                                                                                                                                             |                               |
|----------------------------------------|-----------------------------------------|----------------------------------------|----------------------------------------------------------------------------------------------------------------------------------------------|----------------------------------------------------------------------------------------------------------|----------------------------------------|---------------------------------------------------------------------------------------------------------------------|---------------------------------------------------------------------------------------------------------------------------------------------|-------------------------------|
|                                        |                                         |                                        |                                                                                                                                              | <b>95b:</b> 12.47 17.20<br>95.75<br><b>95c:</b> 12.69 46.28<br>56.81<br><b>95d:</b> 44.54 59.59<br>65.90 |                                        |                                                                                                                     |                                                                                                                                             |                               |
| <b>96</b>                              | Insufficiently soluble for the Mb assay |                                        |                                                                                                                                              |                                                                                                          |                                        |                                                                                                                     |                                                                                                                                             | <b>111</b>                    |
| <b>3.1.5.1. Polynuclear photoCORMs</b> |                                         |                                        |                                                                                                                                              |                                                                                                          |                                        |                                                                                                                     |                                                                                                                                             |                               |
| <b>3.1.5.1. Homonuclear photoCORMs</b> |                                         |                                        |                                                                                                                                              |                                                                                                          |                                        |                                                                                                                     |                                                                                                                                             |                               |
| <b>97a, 97b and 98</b>                 | 410 nm                                  | Mb                                     | <b>97a:</b> 7.56 ± 0.02 equiv.<br><b>97b:</b> 15.24 ± 0.15 equiv.<br><b>98:</b> 1.51 ± 0.07 equiv.                                           | <b>97a:</b> 14.54 ± 0.25 min<br><b>97b:</b> 16.84 ± 0.56 min<br><b>98:</b> 7.41 ± 0.24 min               | 10 % (v/v)<br>DMSO/H <sub>2</sub><br>O | <b>97a:</b> 0.000795 s <sup>-1</sup><br><b>97b:</b> 0.000686 s <sup>-1</sup><br><b>98:</b> 0.001558 s <sup>-1</sup> | <b>97a:</b> (2.66 ± 0.16) × 10 <sup>-3</sup><br><b>97b:</b> (2.71 ± 0.49) × 10 <sup>-3</sup><br><b>98:</b> (3.15 ± 0.27) × 10 <sup>-3</sup> | <b>113</b>                    |
| <b>99a–99h</b>                         | 470 nm                                  | Mb and IR gas phase spectroscopy       | Mb:<br><b>99a:</b> 3 molecules <sup>l</sup><br>IR spectroscopy:<br>Dark<br>2.37 ± 0.06 molecules<br>Illumination<br>7.41 ± 0.31 molecules    | IR spectroscopy:<br>Dark<br>459 ± 80 s<br>Illumination<br>750 ± 340 s                                    | DMSO                                   | IR spectroscopy:<br>Dark<br>459 ± 80 s<br>Illumination<br>750 ± 340 s                                               |                                                                                                                                             | <b>114</b>                    |
| <b>100</b>                             | 365 and 405 nm                          | Portable CO sensor and IR spectroscopy | CO sensor: (µmol/mg)<br>405 nm<br>*100-PLA: 8.1–8.3<br>*100-PMMA: 11.0–11.7<br>365 nm:<br>100-PLA: 10.7<br>100-PMMA: 11.5–11.6               |                                                                                                          | Solvent-free                           |                                                                                                                     |                                                                                                                                             | <b>115</b>                    |
| <b>101 and 102</b>                     | 365, 405, 470 and 480 nm                | Mb and IR gas phase spectroscopy       | <b>101</b> (equiv.)<br>Mb:<br>365 nm: 5.36<br>405 nm: 4.57<br>480 nm: 2.82<br>Gas IR spectroscopy:<br>365 nm: 6.4 ± 0.4<br>470 nm: 6.0 ± 0.5 | <b>101</b><br>Gas IR spectroscopy:<br>365 nm: 920 ± 90 s<br>470 nm: 920 ± 140 s                          | PBS                                    |                                                                                                                     |                                                                                                                                             | <b>116</b>                    |
| <b>103 and 104</b>                     | 365 nm                                  | Mb                                     | <b>104:</b> 1.8 mol                                                                                                                          |                                                                                                          | DMSO                                   |                                                                                                                     |                                                                                                                                             | <b>117</b><br>–<br><b>119</b> |
| <b>105a–105d</b>                       | 365 nm                                  | Mb                                     |                                                                                                                                              |                                                                                                          |                                        |                                                                                                                     |                                                                                                                                             | <b>120</b>                    |
| <b>106a–106h</b>                       | 365 nm                                  | Mb                                     | <b>106e:</b> 2.65 ± 0.13 moles<br><b>106f:</b> 3.61 ± 0.089 moles                                                                            |                                                                                                          |                                        |                                                                                                                     |                                                                                                                                             | <b>121</b>                    |



|                                                     |                                                            |                               |                                                                                                                                                                                                                                                                                                                                                         |                                                                                             |                                                                                                                                                                          |                                                                                                                |                                                                                                                                                                                                          |            |
|-----------------------------------------------------|------------------------------------------------------------|-------------------------------|---------------------------------------------------------------------------------------------------------------------------------------------------------------------------------------------------------------------------------------------------------------------------------------------------------------------------------------------------------|---------------------------------------------------------------------------------------------|--------------------------------------------------------------------------------------------------------------------------------------------------------------------------|----------------------------------------------------------------------------------------------------------------|----------------------------------------------------------------------------------------------------------------------------------------------------------------------------------------------------------|------------|
| <b>107a–107f</b>                                    | 365 nm                                                     | Mb                            | <b>107b</b> : 2.89 ± 0.024 equiv.                                                                                                                                                                                                                                                                                                                       |                                                                                             |                                                                                                                                                                          |                                                                                                                |                                                                                                                                                                                                          | <b>122</b> |
| <b>108a and 108b</b>                                | 365 nm                                                     | Mb<br>FTIR                    | Mb:<br><b>108a</b> : 1.73 ± 0.21 equiv.<br><b>108b</b> : 1.87 ± 0.05 equiv.                                                                                                                                                                                                                                                                             | Mb:<br><b>108a</b> : 9.21 × 10 <sup>2</sup> min<br><b>108b</b> : 3.27 × 10 <sup>2</sup> min | DMSO                                                                                                                                                                     |                                                                                                                |                                                                                                                                                                                                          | <b>123</b> |
| <b>109a–109h</b>                                    | 520–560 nm                                                 | Mb                            | <b>109e</b> : 3.83 ± 0.09 equiv.<br><b>109g</b> : 3.18 ± 0.12 equiv.                                                                                                                                                                                                                                                                                    | <b>109e</b> : 5.37 × 10 <sup>2</sup> s<br><b>109g</b> : 5.82 × 10 <sup>2</sup> s            | PBS                                                                                                                                                                      | <b>109e</b> : 1.29 × 10 <sup>-3</sup> s <sup>-1</sup><br><b>109g</b> : 1.19 × 10 <sup>-3</sup> s <sup>-1</sup> |                                                                                                                                                                                                          | <b>124</b> |
| <b>110</b>                                          | 520–530 nm (Green)<br>465–470 nm (Blue)<br>365–370 nm (UV) | Mb                            | Green: 2.5 equiv.<br>Blue: 2.9 equiv.<br>UV: 2.8 equiv.                                                                                                                                                                                                                                                                                                 | Green: 10 min<br>Blue: 6 min<br>UV: 2 min                                                   | PBS                                                                                                                                                                      | Green: 0.069 min <sup>-1</sup><br>Blue: 0.116 min <sup>-1</sup><br>UV: 0.347 min <sup>-1</sup>                 |                                                                                                                                                                                                          | <b>125</b> |
| <b>3.1.5.2. Heteronuclear photoCORMs</b>            |                                                            |                               |                                                                                                                                                                                                                                                                                                                                                         |                                                                                             |                                                                                                                                                                          |                                                                                                                |                                                                                                                                                                                                          |            |
| <b>111a–111d</b>                                    | Deep red ( <b>111a–111b</b> )<br>NIR ( <b>111c–111d</b> )  | GC-TCD                        | <b>111b</b> (mol):<br>Aerobic CH <sub>3</sub> CN: 2.28 <sup>k</sup><br>(453 nm), 2.01 <sup>k</sup> (659 nm),<br>1.96 <sup>l</sup> (659 nm)<br>Anaerobic CH <sub>3</sub> CN: <<br>0.09 <sup>k</sup><br>Anaerobic 90 % (v/v)<br>CH <sub>3</sub> CN/CHCl <sub>3</sub> : < 0.07 <sup>k</sup><br>Aerobic CH <sub>2</sub> Cl <sub>2</sub> : 1.87 <sup>k</sup> |                                                                                             | Aerobic<br>CH <sub>3</sub> CN<br>Anaerobic<br>CH <sub>3</sub> CN<br>90 % (v/v)<br>CH <sub>3</sub> CN/<br>CHCl <sub>3</sub><br>Aerobic<br>CH <sub>2</sub> Cl <sub>2</sub> |                                                                                                                |                                                                                                                                                                                                          | <b>129</b> |
| <b>112 and 113</b>                                  | 470 and 627 nm                                             | FTIR and GC                   | 3 equiv.                                                                                                                                                                                                                                                                                                                                                |                                                                                             | CH <sub>3</sub> CN                                                                                                                                                       |                                                                                                                | $\Phi_{470}^m$<br><b>112</b> : 0.37 ± 0.06 (0.22 ± 0.03) <sup>n</sup><br><b>113</b> : 0.16 ± 0.03 (0.049 ± 0.008) <sup>n</sup><br>$\Phi_{627}^m$<br><b>112</b> : 0.38 ± 0.04<br><b>113</b> : 0.13 ± 0.01 | <b>130</b> |
| <b>114a and 114b</b>                                | 470 nm                                                     | FTIR                          | <b>114a</b> : 3 COs were released                                                                                                                                                                                                                                                                                                                       |                                                                                             | CH <sub>3</sub> CN                                                                                                                                                       |                                                                                                                |                                                                                                                                                                                                          | <b>131</b> |
| <b>115a–115f</b>                                    | 365 nm                                                     | UV-vis. and FTIR spectroscopy |                                                                                                                                                                                                                                                                                                                                                         |                                                                                             | CH <sub>3</sub> CN                                                                                                                                                       |                                                                                                                |                                                                                                                                                                                                          | <b>132</b> |
| <b>3.1.6. Tridentate ligands</b>                    |                                                            |                               |                                                                                                                                                                                                                                                                                                                                                         |                                                                                             |                                                                                                                                                                          |                                                                                                                |                                                                                                                                                                                                          |            |
| <b>3.1.6.1. Di-(2-picoly)amine based photoCORMs</b> |                                                            |                               |                                                                                                                                                                                                                                                                                                                                                         |                                                                                             |                                                                                                                                                                          |                                                                                                                |                                                                                                                                                                                                          |            |
| <b>117, 118 and 119a–119c</b>                       | 365 nm                                                     | Mb                            | <b>119a</b> : 1.59 equiv.<br><b>119b</b> : 2.65 equiv.<br><b>119c</b> : 1.65 equiv.                                                                                                                                                                                                                                                                     | 20 min for all                                                                              | DMSO                                                                                                                                                                     |                                                                                                                |                                                                                                                                                                                                          | <b>134</b> |

|                      |                                                |                                           |                                                                                                                                                                                           |                                                                                 |                                                                    |                                                                                                                                                                                                                                                                                                                                                    |                                                            |            |
|----------------------|------------------------------------------------|-------------------------------------------|-------------------------------------------------------------------------------------------------------------------------------------------------------------------------------------------|---------------------------------------------------------------------------------|--------------------------------------------------------------------|----------------------------------------------------------------------------------------------------------------------------------------------------------------------------------------------------------------------------------------------------------------------------------------------------------------------------------------------------|------------------------------------------------------------|------------|
| <b>120</b>           | 365 nm                                         | Mb                                        | 365 nm: 3.2 ± 0.1 equiv.<br>Dark incubation: 2.2 ± 0.1 equiv.                                                                                                                             |                                                                                 | DMSO                                                               |                                                                                                                                                                                                                                                                                                                                                    |                                                            | <b>136</b> |
| <b>121</b>           | 365 nm                                         | IR spectro-electrochemistry               | 3 COs                                                                                                                                                                                     |                                                                                 | CH <sub>3</sub> CN/<br>0.1 M<br>(Bu <sub>4</sub> N)PF <sub>6</sub> |                                                                                                                                                                                                                                                                                                                                                    |                                                            | <b>137</b> |
| <b>122a and 122b</b> | 410 nm                                         | Mb                                        |                                                                                                                                                                                           | <b>122a</b> : 16.7 min<br><b>122b</b> : 23.2 min                                | CH <sub>3</sub> CN                                                 | <b>122a</b> : 0.0416 ± 0.0025 min <sup>-1</sup><br><b>122b</b> : 0.02983 ± 0.00113 min <sup>-1</sup>                                                                                                                                                                                                                                               | <b>122a</b> : 0.599 ± 0.036<br><b>122b</b> : 0.426 ± 0.016 | <b>138</b> |
| <b>123 and 124</b>   | 307 nm<br>350 nm                               | Mb                                        |                                                                                                                                                                                           | 1.4–2.2 min                                                                     | CH <sub>3</sub> CN<br>PBS                                          | 307 nm<br><b>123</b> : (9.1 ± 0.2) × 10 <sup>-2</sup> s <sup>-1</sup><br><b>124</b> : (8.1 ± 0.2) × 10 <sup>-2</sup> s <sup>-1</sup><br>350 nm<br><b>123</b> : (6.0 ± 0.2) × 10 <sup>-3</sup> s <sup>-1</sup><br><b>124</b> :<br>CH <sub>3</sub> CN: (8.3 ± 0.2) × 10 <sup>-3</sup> s <sup>-1</sup><br>PBS: 5.6 × 10 <sup>-3</sup> s <sup>-1</sup> | <b>123</b> : 0.07 ± 0.01<br><b>124</b> : 0.06 ± 0.01       | <b>95</b>  |
| <b>124-Al-MCM-41</b> | > 350 nm                                       | Mb                                        |                                                                                                                                                                                           |                                                                                 | PBS                                                                | <b>124-Al-MCM-41</b> released CO more slowly than from <b>124</b> .                                                                                                                                                                                                                                                                                |                                                            | <b>139</b> |
| <b>125 and 126</b>   | 405 nm<br>H <sub>2</sub> O <sub>2</sub>        | Mb                                        | 3 COs                                                                                                                                                                                     |                                                                                 | Aqueous<br>PBS                                                     |                                                                                                                                                                                                                                                                                                                                                    |                                                            | <b>140</b> |
| <b>127</b>           | 490 nm<br>470 nm<br>450 nm<br>413 nm<br>365 nm | Mb and Confocal laser scanning microscopy | Confocal laser scanning microscopy: 150 ppm at 470 nm                                                                                                                                     |                                                                                 | 1% (v/v)<br>(DMSO/<br>PBS)                                         | 490 nm: 5 min <sup>-1</sup>                                                                                                                                                                                                                                                                                                                        | 365 nm: 8%<br>413 nm: 7.7%<br>450: 3.5 %<br>490 nm: 1.2%   | <b>141</b> |
| <b>128</b>           | 405 nm                                         | Mb                                        | <b>128</b> : 3 equiv.<br><b>128</b> entrapped on a paper strip: 1.5 μM mg <sup>-1</sup>                                                                                                   |                                                                                 | DMSO                                                               |                                                                                                                                                                                                                                                                                                                                                    | 1.5 ± 0.2%                                                 | <b>142</b> |
| <b>129 and 130</b>   | two-photon laser beam (800 nm)                 | CO gas sensor                             | <b>129</b> : 220 ppm<br><b>130</b> : 145 ppm<br><b>129</b> and <b>130</b> embedded in poly(L-lactide-co-D/L-lactide) nonwoven fabric material released about 22 and 10 ppm, respectively. |                                                                                 | CH <sub>3</sub> CN                                                 |                                                                                                                                                                                                                                                                                                                                                    |                                                            | <b>143</b> |
| <b>131 and 132</b>   | 550 nm                                         | Mb, Solution IR and CO sensor             | <b>131</b> : Mb and Solution IR: 3 equiv.<br><b>132</b> : CO sensor: 50 ppm<br><b>132-PTFE</b> : 45 ppm                                                                                   |                                                                                 | 2% (v/v)<br>(DMSO/<br>PBS)                                         | <b>131–132</b> : 13 s <sup>-1</sup>                                                                                                                                                                                                                                                                                                                |                                                            | <b>146</b> |
| <b>133–135</b>       | 550–560 nm<br>> 345 nm                         | UV-vis. and Gas chromatography            | About 2.5 units                                                                                                                                                                           | <b>133</b> : 49.9 s<br>At 345 nm:<br><b>133</b> : 6.8 s<br><b>135</b> : 1.7 min | CH <sub>3</sub> CN                                                 | <b>133</b> : 0.01389 s <sup>-1</sup>                                                                                                                                                                                                                                                                                                               | At 475nm:<br><b>133</b> : 0.42<br><b>134</b> : 0.025       | <b>147</b> |

| 3.1.6.2. Pyrazolyl and imidazolyl photoCORMs |                            |                                                     |                                                                                                                                                                        |                                                                                                                                                                           |                                                           |                                                                                                                                                                                                           |                                                                                                                                                                                                                                              |                               |
|----------------------------------------------|----------------------------|-----------------------------------------------------|------------------------------------------------------------------------------------------------------------------------------------------------------------------------|---------------------------------------------------------------------------------------------------------------------------------------------------------------------------|-----------------------------------------------------------|-----------------------------------------------------------------------------------------------------------------------------------------------------------------------------------------------------------|----------------------------------------------------------------------------------------------------------------------------------------------------------------------------------------------------------------------------------------------|-------------------------------|
| <b>136</b>                                   | 365 nm                     | Mb<br>IR spectroscopy                               | About 2 COs<br>3 COs                                                                                                                                                   |                                                                                                                                                                           | DMSO<br>CH <sub>3</sub> CN                                |                                                                                                                                                                                                           |                                                                                                                                                                                                                                              | 149<br>-<br>152               |
| <b>137</b>                                   | 365 nm                     | Mb                                                  | 1.7 equiv.                                                                                                                                                             |                                                                                                                                                                           |                                                           |                                                                                                                                                                                                           |                                                                                                                                                                                                                                              | 153                           |
| <b>138 and 139</b>                           | 365 nm                     | Mb                                                  | <b>138a-138b</b> : 2 moles<br><b>139a-139c</b> : 1 mole                                                                                                                |                                                                                                                                                                           | DMSO                                                      |                                                                                                                                                                                                           |                                                                                                                                                                                                                                              | 155                           |
| <b>140-143</b>                               | 365 nm                     | Mb                                                  | <b>140</b> : 1.61±0.29 equiv.<br><b>141</b> : 1.37±0.08 equiv.<br><b>142</b> : 2.28±0.01 equiv.<br><b>143</b> : 1.04±0.28 equiv.                                       | <b>140</b> : 19 min<br><b>141</b> : 32 min<br><b>142</b> : 17 min<br><b>143</b> : 13 min                                                                                  | DMSO                                                      |                                                                                                                                                                                                           |                                                                                                                                                                                                                                              | 156                           |
| <b>144a-144c</b><br><b>145a-145b</b>         | 365 nm<br>410 nm           | Mb                                                  | <b>144a</b> : 2.3 ± 0.1 equiv.<br><b>144b</b> : 2.5 ± 0.1 equiv.<br><b>144c</b> : 2.3 ± 0.1 equiv.<br><b>145a</b> : 2.1 ± 0.1 equiv.<br><b>145b</b> : 2.1 ± 0.1 equiv. | <b>144a</b> : 21.6 ± 0.3 min<br><b>144b</b> : 21.3 ± 0.5 min<br><b>144c</b> : 18.5 ± 0.2 min<br><b>145a</b> : 25.8 ± 0.2 min <sup>o</sup><br><b>145b</b> : 28.7 ± 0.8 min | DMSO                                                      | <b>144a</b> : 0.00642 s <sup>-1</sup><br><b>144b</b> : 0.01060 s <sup>-1</sup><br><b>144c</b> : 0.01208 s <sup>-1</sup><br><b>145a</b> : 0.00783 s <sup>-1</sup><br><b>145b</b> : 0.00745 s <sup>-1</sup> | <b>144a</b> : (5.9 ± 0.2) × 10 <sup>-3</sup><br><b>144b</b> : (6.3 ± 0.4) × 10 <sup>-3</sup><br><b>144c</b> : (6.6 ± 0.1) × 10 <sup>-3</sup><br><b>145a</b> : (4.4 ± 0.2) × 10 <sup>-3</sup><br><b>145b</b> : (4.3 ± 0.2) × 10 <sup>-3</sup> | 157                           |
| <b>146, 147 and 148a and 148b</b>            | 365 nm                     | Mb<br>- <b>146</b> : IR spectroscopy <sup>151</sup> | <b>146-147, 148a</b> : ≈ 2 equiv.<br><b>148b</b> : 1.42 ± 0.04 equiv.<br><b>146</b> : 3 COs <sup>151</sup>                                                             | <b>146</b> : 6.73 min<br><b>147</b> : 11.35 min<br><b>148a</b> : 3.77 min<br><b>148b</b> : 217 min                                                                        | DMSO<br><b>146</b> :<br>CH <sub>3</sub> CN <sup>151</sup> |                                                                                                                                                                                                           |                                                                                                                                                                                                                                              | 44,<br>151<br>158<br>,<br>159 |
| <b>149</b>                                   | 405 nm<br>470 nm           | Mb and IR gas phase spectroscopy                    | IR:<br>405 nm: 2.92 ± 0.45 CO<br>470 nm: 2.79 ± 0.56 CO<br>Mb: 2 COs                                                                                                   | IR:<br>405 nm: 408 ± 81 s<br>470 nm: 1950 ± 310 s                                                                                                                         | PBS                                                       |                                                                                                                                                                                                           |                                                                                                                                                                                                                                              | 161                           |
| 3.1.6.3. Other tridentate based photoCORMs   |                            |                                                     |                                                                                                                                                                        |                                                                                                                                                                           |                                                           |                                                                                                                                                                                                           |                                                                                                                                                                                                                                              |                               |
| <b>150</b>                                   | 365 nm                     | Mb                                                  | 1 equiv.                                                                                                                                                               | 93.0 ± 9.2 min                                                                                                                                                            | DMSO                                                      |                                                                                                                                                                                                           |                                                                                                                                                                                                                                              | 111                           |
| <b>151 and 152</b>                           | 365 nm<br>405 nm<br>380 nm | - IR gas phase spectroscopy<br>- Mb                 | IR, at 365 nm:<br><b>151</b> : 2.86 ± 0.28 CO<br><b>152</b> : 2.61 ± 0.12 CO                                                                                           |                                                                                                                                                                           | PBS                                                       | Myoglobin, at 380 nm:<br><b>151</b> : 236 ± 24 s<br><b>152</b> : 384 ± 6 s                                                                                                                                |                                                                                                                                                                                                                                              | 162                           |
| 3.1.7. Drug based photoCORMs                 |                            |                                                     |                                                                                                                                                                        |                                                                                                                                                                           |                                                           |                                                                                                                                                                                                           |                                                                                                                                                                                                                                              |                               |
| <b>153</b>                                   | 525 nm<br>468 nm           | Mb                                                  | 525 nm: 1 equiv.<br>470 nm: 2.85 equiv.                                                                                                                                |                                                                                                                                                                           | DMSO                                                      |                                                                                                                                                                                                           |                                                                                                                                                                                                                                              | 163                           |
| <b>154 and 155</b>                           | 412-468 nm                 | Mb                                                  | <b>155</b> : 0.5 equiv. (410 nm),<br>< 0.5 equiv. (468 nm)                                                                                                             |                                                                                                                                                                           | DMSO                                                      |                                                                                                                                                                                                           |                                                                                                                                                                                                                                              | 164                           |

| 3.2. Tetracarbonyl Mn(I) photoCORMs |                             |                                             |                                                                                         |                                                                                                                                                        |                           |  |  |            |
|-------------------------------------|-----------------------------|---------------------------------------------|-----------------------------------------------------------------------------------------|--------------------------------------------------------------------------------------------------------------------------------------------------------|---------------------------|--|--|------------|
| <b>156a and 156b</b>                | 365–400 nm                  | Mb                                          | 3 COs                                                                                   | 365 nm:<br><b>156a</b> : 960 s (40 $\mu$ M)<br><b>156b</b> : 1740 s (40 $\mu$ M)<br>400 nm:<br><b>156a</b> : 300 s (10 $\mu$ M),<br>360 s (40 $\mu$ M) | DMSO                      |  |  | 165        |
| <b>157a–157f</b>                    | 365 nm<br>400 nm            | Mb (365 nm)                                 | <b>157c, 157d</b> : 3 COs                                                               | <b>157a</b> : 23 min <b>157b</b> :<br>17 min<br><b>157c</b> : 27 min <b>157d</b> :<br>18 min<br><b>157e</b> : 30 min <b>157f</b> :<br>14 min           |                           |  |  | 166        |
| <b>158–162</b>                      | 400 nm                      | Mb                                          | <b>158, 159</b> : about 3 COs<br><b>162</b> : 2.5 equiv.                                |                                                                                                                                                        | DMSO                      |  |  | 167        |
| 4. Thermal and redox Mn(I) CORMs    |                             |                                             |                                                                                         |                                                                                                                                                        |                           |  |  |            |
| 4.1. CORM-401                       |                             |                                             |                                                                                         |                                                                                                                                                        |                           |  |  |            |
| <b>163</b>                          | Spontaneous                 | Mb <sup>168, 169</sup><br>GC <sup>168</sup> | Mb: 3.2 equiv. <sup>169</sup><br>GC: 0.33 equiv. <sup>169</sup><br>3 COs <sup>168</sup> | 0.8 min <sup>169</sup>                                                                                                                                 | PBS <sup>168, 169</sup>   |  |  | 168<br>169 |
| 4.2. Other Mn(I) CORMs              |                             |                                             |                                                                                         |                                                                                                                                                        |                           |  |  |            |
| <b>165–168</b>                      | Spontaneous                 | Hemoglobin assay                            |                                                                                         | <b>165</b> : 11.1 min<br><b>166</b> : 8.6 min<br><b>167</b> : 11.3 min<br><b>168</b> : 65 min                                                          | Aqueous solutions         |  |  | 207        |
| <b>169</b>                          | 100 W Xe arc lamp<br>355 nm | Time-resolved IR                            |                                                                                         |                                                                                                                                                        | THF<br>CH <sub>3</sub> CN |  |  | 209        |
| <b>170–172</b>                      | Thermally and 400 nm        | Mb                                          |                                                                                         |                                                                                                                                                        | H <sub>2</sub> O          |  |  | 210        |

<sup>a</sup> CORM-1 reduces acute hypertension and coronary vasoconstriction in rats.

<sup>b</sup> Complexes **1a** and **1b** released  $1.1 \pm 0.1$  ( $t_{1/2} = 124$  min) and  $2$  ( $t_{1/2} = 73$  min) equivalents, respectively of CO under dark conditions upon dissolution in aqueous media.

<sup>c</sup> Complex **7** can block the release of NO and TNF- $\alpha$  in LPS-stimulated RAW264.7 macrophages without clear cytotoxicity.

<sup>d</sup> Along with an increase in concentration and CO release, antioxidant activities of **17a** and **17b** have also grown.

<sup>e</sup> When F<sup>-</sup> ions are present, the rate of CO release is rapid and has a  $t_{1/2} < 1$  (0.8608) min ( $k_{CO} = 0.805$  min<sup>-1</sup>).

<sup>f</sup> Upon illumination of **39** at 525 nm, approximately 4 equivalents of CO were released.

<sup>g</sup> The  $k_{CO}$  values of **63** in DCM and CH<sub>3</sub>CN were  $19.7 \pm 0.2$  ( $t_{1/2} = 15.2$  s) and  $16.9 \pm 0.2$  min<sup>-1</sup> upon illumination at 520 nm, respectively.

<sup>h</sup> The  $k_{CO}$  values of **65** were  $5.11 \pm 0.02$  min<sup>-1</sup> using light with power of 10 mW/cm<sup>2</sup> and  $2.35 \pm 0.02$  min<sup>-1</sup> using power of 1 mW/cm<sup>2</sup>.

<sup>i</sup> Under dark conditions.

<sup>j</sup> Prior to illumination, **99a** released 0.1 molecule of CO/CORM under dark conditions.

<sup>k</sup> 2.75 mM, <sup>m</sup> 0.13 mM.

<sup>l</sup> PF<sub>6</sub><sup>-</sup> salts of the complexes in CH<sub>3</sub>CN at ambient temperature.

<sup>m</sup> Cl<sup>-</sup> salts of the complexes in H<sub>2</sub>O at ambient temperature.

<sup>n</sup> Upon illumination at 410 nm, the t<sub>1/2</sub> value reached to 132 min as a result of the poor absorption at this higher wavelength.

<sup>o</sup> The quantity of CO released by CORM-401 increased in presence of oxidants.

\*Abbreviations:

Mb: myoglobin assay.

FTIR: Fourier transform infrared spectroscopy.

TA: time-resolved.

EPR: electron paramagnetic resonance.

GC: Gas chromatography.

TCD: thermal conductivity detector.

COP-1: carbon monoxide Probe 1.

PLA: poly(L-lactide-co-D/L-lactide).

PMMA: poly(methyl methacrylate).

**Table 2** Antimicrobial properties of the tested Mn(I) carbon monoxide releasing molecules.

| CORM                                                                | Activation wavelength | Bacteria/Fungi                                                                                                                                                                                                                                | Antimicrobial/Antifungal activity                                                                                                                                                                                                                                                                                                                                                                                              | Ref. |
|---------------------------------------------------------------------|-----------------------|-----------------------------------------------------------------------------------------------------------------------------------------------------------------------------------------------------------------------------------------------|--------------------------------------------------------------------------------------------------------------------------------------------------------------------------------------------------------------------------------------------------------------------------------------------------------------------------------------------------------------------------------------------------------------------------------|------|
| <b>3.1.1. Monodentate ancillary ligands</b>                         |                       |                                                                                                                                                                                                                                               |                                                                                                                                                                                                                                                                                                                                                                                                                                |      |
| <b>3a–3f</b>                                                        | 350 nm                | <i>Escherichia coli</i>                                                                                                                                                                                                                       | <ul style="list-style-type: none"> <li>All <b>3a–3f</b>, except for <b>3d</b> exhibited no antibacterial activity.</li> <li>MIC = 128 µg/mL in the dark and 256 µg/mL if light induced</li> </ul>                                                                                                                                                                                                                              | 46   |
| <b>3.1.2. N,N-bidentate ligands</b>                                 |                       |                                                                                                                                                                                                                                               |                                                                                                                                                                                                                                                                                                                                                                                                                                |      |
| <b>3.1.2.1. 2,2'-Bipyridine photoCORMs</b>                          |                       |                                                                                                                                                                                                                                               |                                                                                                                                                                                                                                                                                                                                                                                                                                |      |
| <b>17a and 17b</b>                                                  | 365 nm                | <i>Escherichia coli</i> , <i>Bacillus subtilis</i> , <i>Micrococcus luteus</i> , <i>Pseudomonas aeruginosa</i> , <i>Klebsiella pneumoniae</i> , and <i>Listeria monocytogenes</i> .<br><i>Candida albicans</i> and <i>Aspergillus niger</i> . | <ul style="list-style-type: none"> <li>Both displayed moderate to strong antimicrobial activity against some strains.</li> <li><b>17a</b> exhibited antifungal activity against <i>Candida albicans</i> and <i>Aspergillus niger</i>, in the dark.</li> <li>Antioxidant activities of <b>17a</b> and <b>17b</b> have been grown after illumination.</li> </ul>                                                                 | 57   |
| <b>3.1.2.2. 1,10-Phenanthroline photoCORMs</b>                      |                       |                                                                                                                                                                                                                                               |                                                                                                                                                                                                                                                                                                                                                                                                                                |      |
| <b>23 and 24</b>                                                    | 365–555 nm            | <i>Escherichia coli</i>                                                                                                                                                                                                                       | <ul style="list-style-type: none"> <li>While <b>23d</b> did not inhibit <i>E. coli</i> from growing, the photolyzed solution completely suppresses the bacterial growth.</li> <li>The toxicity had been attributed to the presence of phenanthroline species.</li> </ul>                                                                                                                                                       | 61   |
| <b>28–30</b>                                                        | 435–450 nm            | Multi-drug resistant bacteria                                                                                                                                                                                                                 | <ul style="list-style-type: none"> <li>The toxicity appears to be related to the combination of CO release and iCORM, based on the difference in toxicity under light and dark settings.</li> <li><b>30</b> displayed poor antibacterial activity at low doses, however it was active only at ≥ 128 µg/mL against the Gram-negative bacteria.</li> <li>They were only mildly harmful to <i>Galleria mellonella</i>.</li> </ul> | 67   |
| <b>3.1.2.3. <math>\kappa^2N^1N^2</math>- terpyridine photoCORMs</b> |                       |                                                                                                                                                                                                                                               |                                                                                                                                                                                                                                                                                                                                                                                                                                |      |
| <b>37–42</b>                                                        | 468 nm<br>525 nm      | <i>Escherichia coli</i> ,<br><i>Candida albicans</i><br><i>Candida neoformans</i>                                                                                                                                                             | <ul style="list-style-type: none"> <li><b>41</b> displayed toxicity to <i>Escherichia coli</i> with MIC value of 8 µg/mL.</li> <li>All compounds exhibited antifungal activities against <i>C. albicans</i> and <i>C. neoformans</i> (MIC = 4–32 µg/mL).</li> </ul>                                                                                                                                                            | 74   |

| 3.1.2.5. <i>N,N</i> -Schiff-base photoCORMs            |                        |                                                                                                           |                                                                                                                                                                                                                                                                                                                                                                                                                                                                                                            |        |
|--------------------------------------------------------|------------------------|-----------------------------------------------------------------------------------------------------------|------------------------------------------------------------------------------------------------------------------------------------------------------------------------------------------------------------------------------------------------------------------------------------------------------------------------------------------------------------------------------------------------------------------------------------------------------------------------------------------------------------|--------|
| <b>68</b>                                              | 468 nm<br>525 nm       | <i>Candida albicans</i><br><i>Candida neoformans</i>                                                      | <ul style="list-style-type: none"> <li><b>68</b> displayed antifungal activity (16 µg/mL) against <i>C. albicans</i> and <i>C. neoformans</i> in the dark.</li> <li><b>68</b> was harmful to the HEK-293 with CC<sub>50</sub> of 12.56 µg/mL.</li> </ul>                                                                                                                                                                                                                                                   | 86     |
| 3.1.3. <i>N,O</i> -bidentate ligands                   |                        |                                                                                                           |                                                                                                                                                                                                                                                                                                                                                                                                                                                                                                            |        |
| <b>83</b>                                              | 400 and 465 nm         | <i>E. coli</i> W3110                                                                                      | <ul style="list-style-type: none"> <li><i>E. coli</i> W3110 cell growth is inhibited by <b>83</b> after only irradiation.</li> <li>When <b>83</b> is pre-irradiated before the addition of <i>E. coli</i> W3110 cells, the growth profile of the bacteria is like that observed in the absence of CORM indicating that the bactericidal effect is caused by in situ breakdown of the CORM in the presence of cells.</li> <li>Both <b>83</b> and its iCORM are not toxic to the tested bacteria.</li> </ul> | 99-101 |
| 3.1.4. <i>N,S</i> - and <i>N,Se</i> -bidentate ligands |                        |                                                                                                           |                                                                                                                                                                                                                                                                                                                                                                                                                                                                                                            |        |
| <b>95a-95d</b>                                         | 365-435 nm             | <i>Corynebacterium diphtheriae</i> ,<br><i>Yersinia enterocolitica</i> and<br><i>Micrococcus luteus</i> . | <ul style="list-style-type: none"> <li>The complexes may inhibit the growth of the tested microbes.</li> <li>Blue light significantly improves their antibacterial properties.</li> <li>iCORMs were inactive than the parent compounds.</li> <li>The CO release brought on by irradiation is what caused the growth inhibition.</li> </ul>                                                                                                                                                                 | 110    |
| 3.1.6. Tridentate ligands                              |                        |                                                                                                           |                                                                                                                                                                                                                                                                                                                                                                                                                                                                                                            |        |
| 3.1.6.1. Di-(2-picolyl)amine based photoCORMs          |                        |                                                                                                           |                                                                                                                                                                                                                                                                                                                                                                                                                                                                                                            |        |
| <b>120</b>                                             | 365 nm                 | <i>Escherichia coli</i>                                                                                   | <ul style="list-style-type: none"> <li>Upon illumination, a pronounced and concentration-dependent reduction in the rate of treated <i>E. coli</i> growth was seen when using medium with succinate (the only carbon source) was observed.</li> </ul>                                                                                                                                                                                                                                                      | 136    |
| <b>133-135</b>                                         | 550-560 nm<br>> 345 nm | <i>Escherichia coli</i>                                                                                   | <ul style="list-style-type: none"> <li>Against <i>E. coli</i>, the loaded non-woven fabric demonstrated substantial reductions in bacterial growth after being exposed to light for 6 h.</li> </ul>                                                                                                                                                                                                                                                                                                        | 147    |
| 4. Thermal and redox Mn(I) CORMs                       |                        |                                                                                                           |                                                                                                                                                                                                                                                                                                                                                                                                                                                                                                            |        |
| 4.1. CORM-401                                          |                        |                                                                                                           |                                                                                                                                                                                                                                                                                                                                                                                                                                                                                                            |        |
| <b>163</b>                                             | Spontaneousl<br>y      | <i>Escherichia coli</i><br><i>Pseudomonas aeruginosa</i>                                                  | <ul style="list-style-type: none"> <li><b>163</b> inhibits bacterial growth when used in conjunction with cefotaxime and trimethoprim, studies on fractional inhibition show no interaction.</li> </ul>                                                                                                                                                                                                                                                                                                    | 194    |

|  |  |  |                                                                                                                                                                                           |  |
|--|--|--|-------------------------------------------------------------------------------------------------------------------------------------------------------------------------------------------|--|
|  |  |  | <ul style="list-style-type: none"><li>• The resistance of <i>P. aeruginosa</i> to <b>163</b> may be due the failure of these bacteria to accumulate <b>163</b> intracellularly.</li></ul> |  |
|--|--|--|-------------------------------------------------------------------------------------------------------------------------------------------------------------------------------------------|--|



**Table 3** Cytotoxic properties of Mn(I) carbon monoxide releasing molecules

| CORM                                           | Activation wavelength                            | Cell line *          | Cytotoxic activity                                                                                                                                                                                                                                                                                                                                                                                                                                                                                                                                                            | Ref.   |
|------------------------------------------------|--------------------------------------------------|----------------------|-------------------------------------------------------------------------------------------------------------------------------------------------------------------------------------------------------------------------------------------------------------------------------------------------------------------------------------------------------------------------------------------------------------------------------------------------------------------------------------------------------------------------------------------------------------------------------|--------|
| <b>3.1.1. Monodentate ancillary ligands</b>    |                                                  |                      |                                                                                                                                                                                                                                                                                                                                                                                                                                                                                                                                                                               |        |
| <b>2</b>                                       | 468 nm                                           | THP-1 and BM.        | <ul style="list-style-type: none"> <li>Under dark conditions, <b>2</b> showed mild selective cytotoxic effect with <math>IC_{50} = 68.02 \pm 5.7</math> <math>\mu\text{g/mL}</math> THP-1, and no negative effects were observed against BM cells.</li> <li>The cytotoxicity of <b>2</b> did not largely alter upon the illumination with <math>IC_{50} = 72.62 \pm 5.6</math> <math>\mu\text{g/mL}</math>.</li> <li>Upon illumination <b>2</b> caused extreme cytotoxicity against BM cells with <math>IC_{50} = 4.67 \pm 0.2</math> <math>\mu\text{g/mL}</math>.</li> </ul> | 45     |
| <b>3a–3f</b>                                   | 350 nm                                           | 3T3 fibroblasts      | <ul style="list-style-type: none"> <li>When incubated at 100 <math>\mu\text{M}</math>, <b>3a–3f</b> showed a distinct toxic effect in the dark and under light conditions.</li> </ul>                                                                                                                                                                                                                                                                                                                                                                                         | 46     |
| <b>3.1.2. N,N-bidentate ligands</b>            |                                                  |                      |                                                                                                                                                                                                                                                                                                                                                                                                                                                                                                                                                                               |        |
| <b>3.1.2.1. 2,2'-Bipyridine photoCORMs</b>     |                                                  |                      |                                                                                                                                                                                                                                                                                                                                                                                                                                                                                                                                                                               |        |
| <b>7</b>                                       | Green, blue, and UV light                        | RAW264.7 macrophages | <ul style="list-style-type: none"> <li>Both <b>7</b> and its iCORM are almost non-toxic.</li> <li><b>7</b> can block the release of NO and TNF-<math>\alpha</math> in LPS-stimulated RAW264.7 macrophages without clear cytotoxicity.</li> </ul>                                                                                                                                                                                                                                                                                                                              | 49     |
| <b>13a, 13b, 14, 15a and 15b</b>               | 365 nm                                           | MCF-7                | <ul style="list-style-type: none"> <li><math>IC_{50}</math> (<math>\mu\text{M}</math>) values upon illumination are <math>3.1 \pm 0.1</math>, <math>21 \pm 1</math>, <math>10 \pm 1</math>, <math>2.91 \pm 0.07</math> and <math>9.7 \pm 0.6</math> in that order.</li> </ul>                                                                                                                                                                                                                                                                                                 | 55     |
| <b>16a–16e</b>                                 | 365 nm                                           | MCF-7                | <ul style="list-style-type: none"> <li><b>16a–16e</b> displayed enhanced antiproliferation properties upon illumination.</li> <li><math>IC_{50}</math> (<math>\mu\text{M}</math>) values upon illumination were 2.91, 12.25, 1.79, 1.43 and <math>&lt; 1</math>, respectively.</li> </ul>                                                                                                                                                                                                                                                                                     | 56     |
| <b>3.1.2.2. 1,10-Phenanthroline photoCORMs</b> |                                                  |                      |                                                                                                                                                                                                                                                                                                                                                                                                                                                                                                                                                                               |        |
| <b>21 and 22</b>                               | Low-power visible light                          | HEK-293 and HT29     | <ul style="list-style-type: none"> <li>HT29 cells are eradicated with 100 <math>\mu\text{M}</math> of <b>21</b> or <b>22</b>, leading to a drop to 10–48 % when exposed to visible light.</li> <li>No toxicity against HEK-293 cells.</li> </ul>                                                                                                                                                                                                                                                                                                                              | 59, 60 |
| <b>25</b>                                      | Low power (10 mW/cm <sup>2</sup> ) visible light | OVCAR-5 and SKOV-3   | <ul style="list-style-type: none"> <li>The CO alone was responsible for the cytotoxicity, and the targeted delivery of CO required the presence of the appropriate antigen on the surface of the cancer cells.</li> <li>Neither <b>25</b> in the dark nor the light-inactivated <b>25</b> resulted in any substantial cell death.</li> </ul>                                                                                                                                                                                                                                  | 62     |
| <b>26, 26-B<sub>12</sub></b>                   | 420 nm                                           | MCF-7                | <ul style="list-style-type: none"> <li>In the dark, the B<sub>12</sub> conjugated photoCORMs display a lower toxicity than the corresponding parents.</li> </ul>                                                                                                                                                                                                                                                                                                                                                                                                              | 63     |

|                                                                            |                                                       |                     |                                                                                                                                                                                                                                                                                                                                                                                                                                                                                                                                                                                                                                                                                                                                                               |            |
|----------------------------------------------------------------------------|-------------------------------------------------------|---------------------|---------------------------------------------------------------------------------------------------------------------------------------------------------------------------------------------------------------------------------------------------------------------------------------------------------------------------------------------------------------------------------------------------------------------------------------------------------------------------------------------------------------------------------------------------------------------------------------------------------------------------------------------------------------------------------------------------------------------------------------------------------------|------------|
|                                                                            |                                                       |                     | <ul style="list-style-type: none"> <li>Comparing the toxicity levels of the dark and light studies revealed that there were no noticeable changes or trends.</li> </ul>                                                                                                                                                                                                                                                                                                                                                                                                                                                                                                                                                                                       |            |
| <b>27b</b>                                                                 | low-power visible light                               | MDA-MB-231          | <ul style="list-style-type: none"> <li>100 <math>\mu\text{M}</math> of <b>27b</b> reduced the cell viability by about 50% upon illumination.</li> </ul>                                                                                                                                                                                                                                                                                                                                                                                                                                                                                                                                                                                                       | 66         |
| <b>3.1.2.3. <math>\kappa^2N^1N^2</math>- terpyridine photoCORMs</b>        |                                                       |                     |                                                                                                                                                                                                                                                                                                                                                                                                                                                                                                                                                                                                                                                                                                                                                               |            |
| <b>37–42</b>                                                               |                                                       | HEK-293             | <ul style="list-style-type: none"> <li><b>37</b> experienced serve cytotoxicity to normal HEK-293 with <math>\text{IC}_{50}</math> of 4.878 <math>\mu\text{g}/\text{mL}</math>.</li> </ul>                                                                                                                                                                                                                                                                                                                                                                                                                                                                                                                                                                    | 74         |
| <b>3.1.2.4. Benzimidazole and benzothiazole photoCORMs</b>                 |                                                       |                     |                                                                                                                                                                                                                                                                                                                                                                                                                                                                                                                                                                                                                                                                                                                                                               |            |
| <b>43a<sup>75</sup>, 44<sup>77</sup>, 51<sup>78</sup>, 52<sup>78</sup></b> | 365 nm                                                | SK-Hep1 and HL-7702 | <ul style="list-style-type: none"> <li>Bright green fluorescence is detected in cells after incubation with <b>51</b> and <b>52</b>.</li> <li><b>51</b> has superior anticancer activity against SK-Hep1 cells.</li> </ul>                                                                                                                                                                                                                                                                                                                                                                                                                                                                                                                                    | 75, 77, 78 |
| <b>57</b>                                                                  | Low power (15 $\text{mW}/\text{cm}^2$ ) visible light | MDA-MB-231          | <ul style="list-style-type: none"> <li>iCORM is nontoxic.</li> <li>100 <math>\mu\text{M}</math> of <b>57</b> reduce the cell viability by about 50% upon illumination.</li> </ul>                                                                                                                                                                                                                                                                                                                                                                                                                                                                                                                                                                             | 66         |
| <b>58 and 59</b>                                                           | low-power (mW levels)                                 | HT-29 and HEK-293   | <ul style="list-style-type: none"> <li>The CO-catheter could be used to administer CO to cancerous areas during adjuvant treatment for colon cancer.</li> </ul>                                                                                                                                                                                                                                                                                                                                                                                                                                                                                                                                                                                               | 82         |
| <b>3.1.2.5. <i>N,N</i>-Schiff-base photoCORMs</b>                          |                                                       |                     |                                                                                                                                                                                                                                                                                                                                                                                                                                                                                                                                                                                                                                                                                                                                                               |            |
| <b>68</b>                                                                  | 468 nm<br>525 nm                                      | HEK-293             | <ul style="list-style-type: none"> <li><b>68</b> was harmful with <math>\text{CC}_{50}</math> of 12.56 <math>\mu\text{g}/\text{mL}</math>.</li> </ul>                                                                                                                                                                                                                                                                                                                                                                                                                                                                                                                                                                                                         | 86         |
| <b>69 and 70</b>                                                           | 15 mW visible light                                   | HT-29               | <ul style="list-style-type: none"> <li>When irradiated, both <b>69</b> (<math>\text{IC}_{50} = 40 \mu\text{M}</math>) and <b>70</b> (<math>\text{IC}_{50} = 70 \mu\text{M}</math>) gained cytotoxicity.</li> <li>The free ligands, and their iCORMs are nontoxic in the dark.</li> </ul>                                                                                                                                                                                                                                                                                                                                                                                                                                                                      | 87         |
| <b>62c–62f<br/>71a–71d</b>                                                 | 525 nm<br>468 nm                                      | HepG2               | <ul style="list-style-type: none"> <li>The CORMs were inactive against HepG2 cells in the dark.</li> <li>When exposed to light, <b>62c</b>, <b>62d</b>, <b>71a</b> and <b>71b</b> released CO in a comparable way, but their impact on the cell viability was very different, indicating that the iCORM was the primary cause of the cytotoxicity.</li> <li><b>62d</b> (<math>\text{IC}_{50} = 7.1 \mu\text{M}</math>) showed the highest phototoxicity.</li> </ul>                                                                                                                                                                                                                                                                                           | 88         |
| <b>72a–72f</b>                                                             | 365 nm                                                | HepG2               | <ul style="list-style-type: none"> <li><b>72b</b> and <b>72d</b> are inactive in the dark,</li> <li><b>72a</b> and <b>72c</b> demonstrate cytotoxicity, with <math>\text{IC}_{50}</math> values of 18.1 and 11.8 <math>\mu\text{M}</math>, respectively.</li> <li>The cytotoxicity of <b>72a</b> and <b>72c</b> increased with illumination, <math>\text{IC}_{50} = 7.9</math> and 6.6 <math>\mu\text{M}</math>.</li> <li>The inactive compounds turned active upon illumination, <math>\text{IC}_{50} = 5.7 \mu\text{M}</math> (<b>72b</b>) and 6.7 <math>\mu\text{M}</math> (<b>72d</b>).</li> <li>The nitro derivatives <b>72e</b> and <b>72f</b> are inactive before and after illumination.</li> <li>Synergistic effect between iCORM and CO.</li> </ul> | 89         |
| <b>3.1.2.6. Azo-pyridine photoCORMs</b>                                    |                                                       |                     |                                                                                                                                                                                                                                                                                                                                                                                                                                                                                                                                                                                                                                                                                                                                                               |            |
| <b>75a and 75b</b>                                                         | $\geq 520 \text{ nm}$                                 | HeLa and MDA-MB-231 | <ul style="list-style-type: none"> <li>75 <math>\mu\text{M}</math> of <b>75a</b> and illumination time of 10 min caused about 60% reduction in the cell viability.</li> </ul>                                                                                                                                                                                                                                                                                                                                                                                                                                                                                                                                                                                 | 91, 92     |

| 3.1.2.7. Other <i>N,N</i> -bidentate photoCORMs        |                                                               |                                            |                                                                                                                                                                                                                                                                                                                                                                                                                                                                               |             |
|--------------------------------------------------------|---------------------------------------------------------------|--------------------------------------------|-------------------------------------------------------------------------------------------------------------------------------------------------------------------------------------------------------------------------------------------------------------------------------------------------------------------------------------------------------------------------------------------------------------------------------------------------------------------------------|-------------|
| <b>81b</b>                                             | 468 nm                                                        | HEK-293T and MDA-MB-231                    | <ul style="list-style-type: none"> <li><b>81b</b> exhibits significant cytotoxicity both in the dark and when exposed to light, with IC<sub>50</sub> values of 19.62 and 11.43 μM, respectively.</li> <li>It displayed the same cytotoxic pattern against the normal HEK-293T.</li> <li>The cell viability of the co-treated cells is much lower than that of the cells treated only with Paclitaxel drug and lower than that of the cells treated with <b>82</b>.</li> </ul> | 97          |
| <b>82</b>                                              | 365 nm                                                        | HCT-15, A549 and HeLa                      | <ul style="list-style-type: none"> <li><b>82</b> displayed a photocytotoxicity with IC<sub>50</sub> values of 7.15 ± 0.24, 12.5 ± 1.33, and 20.7 ± 0.94, respectively.</li> </ul>                                                                                                                                                                                                                                                                                             | 98          |
| 3.1.3. <i>N,O</i> -bidentate ligands                   |                                                               |                                            |                                                                                                                                                                                                                                                                                                                                                                                                                                                                               |             |
| <b>84 and 85</b>                                       | 400–700 nm<br>350 nm                                          | HeLa                                       | <ul style="list-style-type: none"> <li>The complexes were non-cytotoxic in the dark (IC<sub>50</sub> &gt; 50 μM).</li> <li>After 30 min of illumination, both complexes reduced the cell viability with IC<sub>50</sub> values in the range of 7.29–36.05 μM.</li> </ul>                                                                                                                                                                                                      | 103         |
| <b>86a and 86b</b>                                     | 468 nm                                                        | HEK-283T, MDA-MB-231 and SW-620.           | <ul style="list-style-type: none"> <li><b>86a</b> and <b>86b</b> had no effect up to 50 μM.</li> </ul>                                                                                                                                                                                                                                                                                                                                                                        | 104         |
| <b>87</b>                                              | 468 nm                                                        | HEK-283T and MDA-MB-231.                   | <ul style="list-style-type: none"> <li><b>87</b> is inactive up to 50 μM against MDA-MB-231 under both dark and light conditions.</li> </ul>                                                                                                                                                                                                                                                                                                                                  | 97          |
| <b>88</b>                                              | - UV (365–370)<br>- Blue (465–470)<br>- Green (520–530)<br>nm | RAW264.7                                   | <ul style="list-style-type: none"> <li><b>88</b> and its iCORM are almost non-toxic.</li> <li>It can block the release of NO and TNF-α in LPS-stimulated RAW264.7 macrophages without obvious cytotoxicity.</li> </ul>                                                                                                                                                                                                                                                        | 49          |
| 3.1.4. <i>N,S</i> - and <i>N,Se</i> -bidentate ligands |                                                               |                                            |                                                                                                                                                                                                                                                                                                                                                                                                                                                                               |             |
| <b>95a–95d</b>                                         | 365–435 nm                                                    | A549 and HEK-293T.                         | <ul style="list-style-type: none"> <li>In a dose-dependent manner, <b>95a–95d</b> and their iCORMs exhibit cytotoxic effects.</li> <li>The cytotoxicity was not significantly changed by irradiation.</li> <li>The cytotoxicity of <b>95b</b> against HEK293T cells was increased by blue light irradiation.</li> </ul>                                                                                                                                                       | 110         |
| 3.1.5. Polynuclear photoCORMs                          |                                                               |                                            |                                                                                                                                                                                                                                                                                                                                                                                                                                                                               |             |
| 3.1.5.1. Homonuclear photoCORMs                        |                                                               |                                            |                                                                                                                                                                                                                                                                                                                                                                                                                                                                               |             |
| <b>103 and 104</b>                                     | 365 nm                                                        | A549, HeLa, MDA MB-231, HCT-15 and HEK-293 | <ul style="list-style-type: none"> <li>Upon illumination, <b>103</b> was cytotoxic against HCT-15 and A549 cells with IC<sub>50</sub> values of 28.7 ± 0.16 and 15.7 ± 0.98 μM, respectively.</li> <li>Upon illumination, <b>104</b> exhibited broad-spectrum inhibitory effects against HCT-15, HeLa, A549 and MDA MB-231 cells with low IC<sub>50</sub> values of 15.4 ± 0.67 (HeLa), 15.8 ± 1.75 (A549) and 14.5 ± 0.97 (HCT-15).</li> </ul>                               | 117–<br>119 |

|                                                      |                                                         |                                 |                                                                                                                                                                                                                                                                                                                                                                                                                                                                                                                                                                   |     |
|------------------------------------------------------|---------------------------------------------------------|---------------------------------|-------------------------------------------------------------------------------------------------------------------------------------------------------------------------------------------------------------------------------------------------------------------------------------------------------------------------------------------------------------------------------------------------------------------------------------------------------------------------------------------------------------------------------------------------------------------|-----|
|                                                      |                                                         |                                 | <ul style="list-style-type: none"> <li>Upon illumination, <b>104</b> also showed IC<sub>50</sub> (μM) values of 21.37 ± 1.72 (A549), 24.12 ± 1.03 (HeLa), 21.89 ± 0.59 (MDA MB-231), and 13.69 ± 0.91 (HCT-15).</li> <li><b>104</b> showed low toxicity against normal HEK-293 cells (&gt; 50 μM).</li> </ul>                                                                                                                                                                                                                                                     |     |
| <b>105a–105d</b>                                     | 365 nm                                                  | HEK-293, HCT-15, HeLa and A549. | <ul style="list-style-type: none"> <li><b>105b</b>: minimum action on HCT-15 (13.18 ± 2.57 μM) and HeLa (12.05 ± 3.12 μM) cells, but potent against A549.</li> <li><b>105c</b>: at 365 nm, displayed potency (IC<sub>50</sub> = 11.41–33.12 μM) against malignant cell lines.</li> <li><b>105c</b> triggers cellular machinery related to apoptosis. It showed no toxicity against HEK-293 cells.</li> <li><b>105d</b>: minimum toxicity toward all tested cells.</li> </ul>                                                                                      | 120 |
| <b>106a–106h</b>                                     | 365 nm                                                  | HEK-293, A549, HCT-15 and HeLa. | <ul style="list-style-type: none"> <li><b>106f</b> was the most potent compound against lung (IC<sub>50</sub> = 6.74 ± 1.77), cervical (IC<sub>50</sub> = 4.92 ± 0.89), and colon (IC<sub>50</sub> = 2.54 ± 0.579) cancer cells</li> <li><b>106f</b> was not toxic against normal HEK-293 cells.</li> </ul>                                                                                                                                                                                                                                                       | 121 |
| <b>107a–107f</b>                                     | 365 nm                                                  | HeLa, A549, HCT-15 and HEK-293  | <ul style="list-style-type: none"> <li><b>107b</b> exhibited cytotoxicity with IC<sub>50</sub> values in the range of 1.78–50.38 μM in the dark against cancer cells and no effect on HEK-293 cells.</li> <li><b>107c</b> and <b>107f</b> exhibited selective cytotoxic effect against HCT-15 and HeLa cells with IC<sub>50</sub> = 31.14 ± 3.81 μM and 5.05 ± 0.76 μM, respectively.</li> <li><b>107d</b> showed cytotoxicity against HeLa, A549 and HCT-15 cells with IC<sub>50</sub> = 4.23 ± 0.56, 23.37 ± 1.41 and 16.38 ± 1.94 μM, respectively.</li> </ul> | 122 |
| <b>109a–109h</b>                                     | 520–560 nm                                              | HeLa, HCT-15, A549 and HEK-293. | <ul style="list-style-type: none"> <li>Under dark conditions, apoptosis was induced by <b>109e</b> and <b>109g</b> treatment to the cancer cells.</li> </ul>                                                                                                                                                                                                                                                                                                                                                                                                      | 123 |
| <b>110</b>                                           | 520–530 (Green)<br>465–470 (Blue)<br>365–370 (UV)<br>nm | RAW264.7                        | <ul style="list-style-type: none"> <li><b>110</b> and its iCORM did not substantially reduce the cell viability.</li> <li><b>110</b> prevented LPS-stimulated RAW264.7 macrophages from secreting NO and TNF-α without clearly cytotoxic side effects.</li> </ul>                                                                                                                                                                                                                                                                                                 | 125 |
| <b>3.1.5.2. Heteronuclear photoCORMs</b>             |                                                         |                                 |                                                                                                                                                                                                                                                                                                                                                                                                                                                                                                                                                                   |     |
| <b>115a–115f</b>                                     | 365 nm                                                  | HEK-293T.                       | <ul style="list-style-type: none"> <li><b>115a</b> and <b>115c</b> exhibited strongest cytotoxicity against HEK-293T with LD<sub>50</sub> ≥ 10 μM.</li> <li>The rest of the complexes showed weaker cytotoxicity in the range of 20–40 μM.</li> </ul>                                                                                                                                                                                                                                                                                                             | 132 |
| <b>3.1.6. Tridentate ligands</b>                     |                                                         |                                 |                                                                                                                                                                                                                                                                                                                                                                                                                                                                                                                                                                   |     |
| <b>3.1.6.1. Di-(2-picolyl)amine based photoCORMs</b> |                                                         |                                 |                                                                                                                                                                                                                                                                                                                                                                                                                                                                                                                                                                   |     |
| <b>117, 118 and 119a–119c</b>                        | 365 nm                                                  | HCT116 and HepG2                | <ul style="list-style-type: none"> <li>Under both dark and illumination conditions, <b>118</b>, <b>119a</b> and <b>119b</b> exhibited no cytotoxicity.</li> <li><b>117</b> and <b>119c</b> displayed cytotoxicity that is not related to the CO-releasing process.</li> <li>When irradiated, the IC<sub>50</sub> values of <b>117</b> in HCT116 and HepG2 cells were (50 ± 21) and (60 ± 13), while in the dark were (41 ± 6) and (61 ± 10), respectively.</li> </ul>                                                                                             | 134 |

|                                                     |                                |                               |                                                                                                                                                                                                                                                                                                                                                                                                                   |          |
|-----------------------------------------------------|--------------------------------|-------------------------------|-------------------------------------------------------------------------------------------------------------------------------------------------------------------------------------------------------------------------------------------------------------------------------------------------------------------------------------------------------------------------------------------------------------------|----------|
|                                                     |                                |                               | <ul style="list-style-type: none"> <li>The copolymer <b>117</b> exhibited cytotoxicity, whereas neither the bpma ligands nor the polymer exhibited significant cytotoxicity.</li> </ul>                                                                                                                                                                                                                           |          |
| <b>127</b>                                          | 490, 470, 450, 413 and 365 nm  | HepaRG <sup>®</sup> and LX-2. | <ul style="list-style-type: none"> <li>Up to a dose of 250 <math>\mu</math>M, <b>127</b> and its iCORM revealed no cytotoxic effects against the tested cells.</li> </ul>                                                                                                                                                                                                                                         | 141      |
| <b>128</b>                                          | 405 nm                         | LX-2 and HepaRG <sup>®</sup>  | <ul style="list-style-type: none"> <li><b>128</b> exhibited moderate cytotoxicity to LX-2 and HepaRG<sup>®</sup> (<math>IC_{50} \approx 30</math> nM).</li> </ul>                                                                                                                                                                                                                                                 | 142      |
| <b>129 and 130</b>                                  | Two-photon laser beam (800 nm) | HeLa and LX-2                 | <ul style="list-style-type: none"> <li>The complexes were non-toxic to both cell lines even at higher concentrations.</li> </ul>                                                                                                                                                                                                                                                                                  | 143      |
| <b>131 and 132</b>                                  | 550 nm                         | HEK cells                     | <ul style="list-style-type: none"> <li>Both <b>131</b> and <b>132</b> showed lower cytotoxicity toward HEK cells than their iCORMs.</li> </ul>                                                                                                                                                                                                                                                                    | 146      |
| <b>133–135</b>                                      | 550–560 nm > 345 nm            | L929 and C6.                  | <ul style="list-style-type: none"> <li>Under low intensity light exposure, the non-woven fabric significantly killed C6 cancer cells while exhibiting minimal toxicity to 1929 cell lines.</li> </ul>                                                                                                                                                                                                             | 147      |
| <b>3.1.6.2. Pyrazolyl and imidazolyl photoCORMs</b> |                                |                               |                                                                                                                                                                                                                                                                                                                                                                                                                   |          |
| <b>136</b>                                          | 365 nm                         | HT-29                         | <ul style="list-style-type: none"> <li><b>136</b> exhibits photoinitiated cytotoxicity, resulting in a decrease in cell biomass by 30%.</li> </ul>                                                                                                                                                                                                                                                                | 149, 150 |
| <b>149</b>                                          | 405 nm<br>470 nm               | LX-2 and HepaRG <sup>®</sup>  | <ul style="list-style-type: none"> <li><b>149</b> exhibited no cytotoxic effects on HepaRG<sup>®</sup> and LX-2 at concentrations &lt; 63 <math>\mu</math>mol L<sup>-1</sup>.</li> <li>HepaRG<sup>®</sup> (<math>EC_{50} = 100</math> <math>\mu</math>mol L<sup>-1</sup>) was discovered to be more responsive to <b>149</b> than LX-2 (<math>EC_{50} = 146</math> <math>\mu</math>mol L<sup>-1</sup>)</li> </ul> | 161      |
| <b>3.1.6.3. Other tridentate based photoCORMs</b>   |                                |                               |                                                                                                                                                                                                                                                                                                                                                                                                                   |          |
| <b>151 and 152</b>                                  | 365 nm<br>405 nm<br>380 nm     | LX-2 and HepaRG <sup>®</sup>  | <ul style="list-style-type: none"> <li>Both complexes were found to be non-toxic for HepaRG<sup>®</sup> or LX-2 cells.</li> <li>Unlike <b>151</b>, complex <b>152</b> accumulates in cells enabling administration of CO inside of cells.</li> </ul>                                                                                                                                                              | 162      |
| <b>3.2. Tetracarbonyl Mn(I) photoCORMs</b>          |                                |                               |                                                                                                                                                                                                                                                                                                                                                                                                                   |          |
| <b>156a and 156b</b>                                | 365–400 nm                     | Murine RAW 264.7 macrophages  | <ul style="list-style-type: none"> <li><b>156a</b> was viable at 10 <math>\mu</math>M, but when exposed to light, the cell viability was reduced to 80%.</li> <li><b>156b</b> and its iCORM displayed no cytotoxicity.</li> <li>The LDH assay showed that <b>156a</b> and <b>156b</b> did not induce the release of LDH up to 100 <math>\mu</math>M.</li> </ul>                                                   | 165      |
| <b>158–162</b>                                      | 400 nm                         | Murine RAW 264.7 macrophages  | <ul style="list-style-type: none"> <li>At 50 <math>\mu</math>M, <b>159</b> exhibited a low level of cytotoxicity, and at 100 <math>\mu</math>M, it significantly reduced cell viability.</li> <li>The photo by-products of <b>158</b> and <b>159</b> had no influence on the cell viability and LDH release.</li> </ul>                                                                                           | 167      |

|                                         |             |                                                                   |                                                                                                                                                                                                                                                                                                                                                                                          |             |
|-----------------------------------------|-------------|-------------------------------------------------------------------|------------------------------------------------------------------------------------------------------------------------------------------------------------------------------------------------------------------------------------------------------------------------------------------------------------------------------------------------------------------------------------------|-------------|
|                                         |             |                                                                   | <ul style="list-style-type: none"> <li>Transformation of <b>159</b> into <b>160</b> during the assay may be the cause of this toxicity.</li> <li><b>161</b> was safe to RAW 264.7 cells at 50 <math>\mu\text{M}</math>.</li> <li>Under dark and light condition, <b>162</b> is not toxic.</li> </ul>                                                                                     |             |
| <b>4. Thermal and redox Mn(I) CORMs</b> |             |                                                                   |                                                                                                                                                                                                                                                                                                                                                                                          |             |
| <b>4.1. CORM-401</b>                    |             |                                                                   |                                                                                                                                                                                                                                                                                                                                                                                          |             |
| <b>163</b>                              | Spontaneous | Murine RAW264.7 macrophages, hLMVEC and MDA-MB-231-luc2-tdTomato. | <ul style="list-style-type: none"> <li>100 <math>\mu\text{M}</math> of <b>163</b> decreased the cell viability by 25%.</li> <li>The amount of nitrite formed in response to treatment of lipopolysaccharide was decreased by 70%.</li> <li>Breast cancer cell transmigration through hLMVEC was significantly reduced by <b>163</b> and PAPA NONOate alone or in combination.</li> </ul> | 168,<br>170 |
| <b>4.2. Other Mn(I) CORMs</b>           |             |                                                                   |                                                                                                                                                                                                                                                                                                                                                                                          |             |
| <b>164</b>                              |             | HeLa                                                              | <ul style="list-style-type: none"> <li>With <math>\text{IC}_{50} = 402.86 \mu\text{M}</math>, <b>164</b> was cytotoxic against HeLa cells.</li> </ul>                                                                                                                                                                                                                                    | 206         |

\*Cell lines:

THP-1: human leukemia monocytic cells. BM: bone marrow cells. 3T3 fibroblasts: cells of murine embryonic fibroblasts. RAW264.7 macrophages: macrophages derived from a tumour created by the Abelson mouse leukemia virus in a male mouse. MCF-7: breast cancer cells. HEK-293: human embryonic kidney cells. HT29: colorectal adenocarcinoma.

OVCAR-5: metastatic gastrointestinal carcinoma. SKOV-3: human ovarian cancer cells. MDA-MB-231: triple negative breast cancer cells. SK-Hep1: hepatic adenocarcinoma.

HL-7702: human liver cells. HepG2: hepatocarcinoma. HeLa: cervical cancer cells. HCT-15: human colon cancer cells. A549: lung cancer cells. SW-620: colorectal cancer cells. HCT116: human colorectal cancer cells. HepaRG®: Parenchymal hepatocyte-like cells. LX-2: non-parenchymal hepatic stellate cell-like cells. L929: NCTC clone 929 of strain L.

C6: rat glioma cells. hLMVEC: human lung microvascular endothelial cells. MDA-MB-231-luc2-tdTomato: human breast cancer cells.

**Note:** The citation of the references in the table matches the information provided in the main article.
